1 **RESEARCH ARTICLE**

2

3 **Primary restriction of S-RNase cytotoxicity by a stepwise**  
4 **ubiquitination and degradation pathway in *Petunia hybrida***

5

6 Hong Zhao<sup>1,2 †</sup>, Yanzhai Song<sup>1,2 †</sup>, Junhui Li<sup>1,2</sup>, Yue Zhang<sup>1,2</sup>, Huaqiu Huang<sup>1,2</sup>, Qun  
7 Li<sup>1</sup>, Yu'e Zhang<sup>1</sup>, Yongbiao Xue<sup>1,2,3,4 \*</sup>

8

9 <sup>1</sup>State Key Laboratory of Plant Cell and Chromosome Engineering, Institute of  
10 Genetics and Developmental Biology, and The Innovation Academy of Seed Design,  
11 Chinese Academy of Sciences, Beijing 100101, China

12

13 <sup>2</sup>University of Chinese Academy of Sciences, Beijing 100049, China

14

15 <sup>3</sup>Beijing Institute of Genomics, Chinese Academy of Sciences, and National Centre  
16 for Bioinformation, Beijing 100101, China

17

18 <sup>4</sup>Jiangsu Co-Innovation Center for Modern Production Technology of Grain Crops,  
19 Yangzhou University, Yangzhou 225009, China

20

21 **†Contributed equally to this work**

22 **\* Author for correspondence**

23 **E-mail:** ybxue@genetics.ac.cn

24 **Phone:** +86-01-6480-1181

25 **Fax:** +86-10-6480-1292

26

27 **Short title:** stepwise restriction of S-RNase cytotoxicity

28

29 **Keywords:** ubiquitination, self-incompatibility, S-RNase, SLF, *Petunia hybrida*

30

31 The author responsible for distribution of materials integral to the findings presented

32 in this article in accordance with the policy described in the Instructions for Authors

33 (www.plantcell.org) are: Yongbiao Xue (ybxue@genetics.ac.cn)

34 **ABSTRACT**

35 In self-incompatible Solanaceous species, the pistil S-RNase acts as cytotoxin to  
36 inhibit self-pollination but is polyubiquitinated by the pollen-specific non-self  
37 S-locus F-box (SLF) proteins and subsequently degraded by the  
38 ubiquitin-proteasome system (UPS), allowing cross-pollination. However, it remains  
39 unclear how S-RNase is restricted by the UPS. Here, we first show that *Petunia*  
40 *hybrida* (Ph) S<sub>3</sub>-RNase is largely ubiquitinated by K48-linked polyubiquitin chains  
41 at three regions, R I, II and III. R I is ubiquitinated in unpollinated, self- and  
42 cross-pollinated pistils, indicating its occurrence prior to PhS<sub>3</sub>-RNase uptake into  
43 pollen tubes, whereas R II and III are exclusively ubiquitinated in cross-pollinated  
44 pistils. Second, removal of R II ubiquitination resulted in significantly reduced seed  
45 sets from cross-pollination and that of R I and III in less extents, indicating their  
46 increased cytotoxicity. In consistent, the mutated R II of PhS<sub>3</sub>-RNase resulted in  
47 marked reduction of its degradation, whereas that of R I and III in less reductions.  
48 Taken together, our results demonstrate that PhS<sub>3</sub>-RNase R II functions as a major  
49 ubiquitination region for its destruction and R I and III as minor ones, revealing that  
50 its cytotoxicity is primarily restricted by a stepwise UPS mechanism for  
51 cross-pollination in *P. hybrida*.

52

53 **ONE SENTENCE SUMMARY**

54 Biochemical and transgenic analyses reveal that *Petunia hybrida* S<sub>3</sub>-RNase  
55 cytotoxicity is largely restricted by a stepwise ubiquitination and degradation  
56 pathway during cross-pollination.

57

## 58 INTRODUCTION

59 Self-incompatibility (SI), an inability of a fertile seed plant to produce zygote after  
60 self-pollination, represents a reproductive barrier adopted by nearly 40% of  
61 flowering plant species to prevent self-fertilization and to promote outcrossing  
62 (Nettancourt, 2001). In many species, SI is usually controlled by a single  
63 multi-allelic *S*-locus encoding both male and female *S* determinants (Takayama and  
64 Isogai, 2005). Their molecular interaction confers the pistil an ability to distinguish  
65 between genetically related self- and non-self-pollen. In general, SI can be classified  
66 into self- and non-self-recognition systems based on their distinct molecular  
67 mechanisms (Fujii *et al.*, 2016). In the self-recognition system of the Papaveraceae  
68 and Brassicaceae, self-pollen rejection occurs as a specific interaction between the *S*  
69 determinants from the same *S* haplotype. In *Papaver rhoeas*, the female  
70 *S*-determinant Prs *S* (*P. rhoeas* stigmatic *S*) interacts with its cognate Prp *S* (*P.*  
71 *rhoeas* pollen *S*) to stimulate a signaling cascade leading to programmed cell death  
72 (PCD) of self-pollen (Wilkins *et al.*, 2014). In Brassicaceae, SI response is initiated  
73 by the specific interaction of the stigma *S*-locus receptor kinase (SRK) and its  
74 cognate pollen coat-localized ligand *S*-locus cysteine-rich protein (SCR/SP11),  
75 triggering a phosphorylation-mediated signaling pathway resulting in destruction of  
76 factors indispensable for pollen compatibility by the UPS (Samuel *et al.*, 2009).  
77 S-RNase-based SI, also termed as Solanaceae-type SI, is a well-studied  
78 non-self-recognition system widely present in Solanaceae, Plantaginaceae, Rosaceae  
79 and Rutaceae (Fujii *et al.*, 2016; Liang *et al.*, 2020). In this system, the pistil *S*  
80 determinant S-RNase serving as cytotoxin can be recognized and ubiquitinated by  
81 multiple pollen *S* determinants SLFs forming functional SCF ubiquitin ligases in a  
82 collaborative non-self-recognition manner, thus restricting cytotoxicity of non-self  
83 S-RNases resulting in cross-pollination (Hua and Kao, 2008; Kubo *et al.*, 2010; Liu  
84 *et al.*, 2014; Qiao *et al.*, 2004b; Zhang *et al.*, 2009).

85 However, it remains largely unclear how S-RNases are specifically regulated in  
86 the non-self-recognition system. Currently, two models, the S-RNase degradation

87 model and the S-RNase compartmentalization model, have been proposed to explain  
88 how S-RNase cytotoxicity is restricted for cross-pollination (Goldraij *et al.*, 2006;  
89 Liu *et al.*, 2014; Qiao *et al.*, 2004b). The degradation model proposed that both self  
90 and non-self S-RNases taken up by pollen tubes are mainly localized in the cytosol,  
91 where further recognized by SLFs. Entani *et al.* (2014) showed that SCF<sup>SLF</sup>  
92 complexes can specifically polyubiquitinate non-self S-RNases rather than self ones  
93 *in vitro* in *P. hybrida*, providing evidence for S-RNase ubiquitination by cross pollen.  
94 Whereas in the self-pollen tubes, binding of self S-RNase and SLF leads to the  
95 formation of nonfunctional SCF<sup>SLF</sup> complex, thus resulting in survival of self  
96 S-RNase to inhibit pollen tube growth. Together with the discoveries of SCF<sup>SLF</sup>  
97 complex components such as SLF-interacting SKP1-like 1 (SSK1) and Cullin1 in  
98 the species from Solanaceae, Plantaginaceae and Rosaceae (Entani *et al.*, 2014;  
99 Huang *et al.*, 2006; Li and Chetelat, 2014; Xu *et al.*, 2013; Zhao *et al.*, 2010), the  
100 degradation model appears to function in flowering plants possessing  
101 S-RNase-based SI. In *Nicotiana* species, Goldraij *et al.* (2006) proposed that the  
102 majority of self- and non-self S-RNases would be sequestered in vacuole-like  
103 structures once imported into pollen tubes and subsequently self recognition between  
104 SLFs and a small fraction of S-RNases localized in the cytosol would break the  
105 structures, releasing S-RNases in a late-stage of self-pollination, thus triggering the  
106 SI response, whereas non-self recognition could stabilize them and maintain  
107 S-RNase sequestration. Most previous studies showed that S-RNase degradation  
108 instead of compartmentalization acts as the major strategy to restrict S-RNase  
109 cytotoxicity (Liu *et al.*, 2014). Nevertheless, little is known about the linkage type of  
110 the polyubiquitin chains and the specific residue of S-RNase ubiquitinated by  
111 non-self SCF<sup>SLF</sup> complexes in cross pollen.

112 To address these questions, in this study, we first established an *in vivo* assay for  
113 examining polyubiquitination of PhS<sub>3</sub>-RNase in cross-pollinated pistils and, together  
114 with *in vitro* ubiquitination analyses, we found that it is mainly ubiquitinated by  
115 K48-linked polyubiquitin chains in three regions named R I, II and III. Among them,

116 R I ubiquitination occurs before PhS<sub>3</sub>-RNase entry into pollen tubes and likely  
117 mediated by an unknown E3 ligase, whereas those of R II and III are specifically  
118 ubiquitinated by SCF<sup>SLF</sup>. Second, the ubiquitination removal of those three regions  
119 had little effect on the physicochemical properties of PhS<sub>3</sub>-RNase, but negatively  
120 impacted their functions in cross-pollen tubes. The transgene with a mutated R II led  
121 to significant reduction of seed sets from cross-pollination, whereas the mutated R I  
122 and III to much less extents in *P. hybrida*, showing that R II ubiquitination of  
123 PhS<sub>3</sub>-RNase plays a major role for its destruction and cytotoxicity restriction,  
124 whereas R I and III minor roles. Furthermore, the ubiquitination removal of all three  
125 regions did not completely inhibit PhS<sub>3</sub>-RNase degradation and cross seed sets,  
126 suggesting that the UPS is not the exclusive mechanism to restrict S-RNase  
127 cytotoxicity. Taken together, our results demonstrate a stepwise UPS mechanism for  
128 primary restriction of S-RNase cytotoxicity during cross-pollination in *P. hybrida*,  
129 providing novel mechanistic insight into a dynamic regulation of S-RNases.

130

## 131 **RESULTS**

### 132 **S-RNase polyubiquitination mainly occurs through K48 linkages at three** 133 **conserved spatial regions among S-RNases**

134 Previous studies have revealed that S-RNase is ubiquitinated in cross-pollen tubes,  
135 but it remains unclear about its ubiquitination linkage type and site. To examine them,  
136 we performed an *in vitro* ubiquitination assay and showed that both oligo- and  
137 polyubiquitinated PhS<sub>3</sub>-RNase were detected by anti-ubiquitin, -PhS<sub>3</sub>-RNase and  
138 -ubiquitin-K48 antibodies compared to *PhS<sub>3</sub>S<sub>3L</sub>* wild-type control, indicating that  
139 non-self PhS<sub>3L</sub>SLF1 are capable of forming SCF<sup>SLF</sup> complex to ubiquitinate  
140 PhS<sub>3</sub>-RNase mainly through K48-linked polyubiquitin chains (Fig. 1A). To further  
141 detect the ubiquitination site of S-RNase, we used LC-MS/MS and identified six  
142 ubiquitinated residues at T102, K103, C118, T153, K154 and K217 of PhS<sub>3</sub>-RNase  
143 by wild type pistils cross-pollinated with the transgenic pollen containing the

144 pollen-specific *PhS<sub>3L</sub>SLF1* in *P. hybrida* (Fig. 1B and Supplemental Fig. 1).  
145 Furthermore, we found that the ubiquitinated C118, T153, K154 and K217 were  
146 exclusively detected in cross-pollinated pistils, suggesting that they are specific for  
147 cross-pollination, whereas the ubiquitinated T102 and K103 were detected in both  
148 unpollinated and self-pollinated pistils (Supplemental Fig. 2), suggesting that they  
149 likely occur before S-RNase uptake into pollen tubes.

150 To determine the locations of these ubiquitinated amino acid residues in S-RNases,  
151 we compared a total of 37 S-RNases from Solanaceae and found that C118 is within  
152 conservative (C) 3 region, T102 and K103 adjacent to hypervariable (Hv) b, T153  
153 and K154 between C4 and C5 and K217 at the C terminal region, implying they are  
154 located in three largely conserved S-RNase regions (Fig. 1C and Supplemental Fig.  
155 3). Next, we reasoned that the ubiquitination sites should be spatially close to E2. To  
156 examine this possibility, we determined the spatial localization of six ubiquitinated  
157 residues on the spatial structure of PhS<sub>3</sub>-RNase and found that T102 and K103 are  
158 located near the Hvb region on an interface between S-RNase and SLF and termed  
159 region (R) I, T153, K154 and K217 in a region close to E2 and termed R II, whereas  
160 C118 inside the predicted spatial structure named as R III (Fig. 1D). Taken together,  
161 our results demonstrated that S-RNases are ubiquitinated mainly through K48  
162 linkage at three largely conserved spatial regions among S-RNases.

163

### 164 **Two ubiquitinated amino acids from R I are partially involved in PhS<sub>3</sub>-RNase** 165 **degradation for cross-pollination**

166 To examine how six ubiquitinated amino acids from three spatial regions mediate the  
167 S-RNase ubiquitination, we first designed a mutant construct named MI containing  
168 T102A and K103R substitutions incapable of ubiquitination at R I of PhS<sub>3</sub>-RNase  
169 and showed that its RNase activity increases with time similar to wild type  
170 (Supplemental Fig. 4A), suggesting that MI possesses normal ribonuclease activity.  
171 To examine whether the substitutions affect subcellular location of PhS<sub>3</sub>-RNase, we

172 did fractionation experiments and found that MI is predominantly enriched in the  
173 S160 fraction derived from the pollen tube cytosol similar to wild type PhS<sub>3</sub>-RNase  
174 (S<sub>3</sub>R) (Supplemental Fig. 4B and C). Furthermore, we performed pull-down, split  
175 firefly luciferase complementation (SFLC) and bimolecular fluorescence  
176 complementation (BiFC) assays and found that MI is capable of interacting with  
177 non-self PhS<sub>3L</sub>SLF1 (Supplemental Fig. 4D-F). Nevertheless, we also found that it  
178 displayed a weak interaction with self PhS<sub>3</sub>SLF1 (Supplemental Fig. 5), similar to  
179 previous studies (Kubo *et al.*, 2010). Consistent with these findings, we found that  
180 the structure and electrostatic potentials of MI remain essentially unaltered  
181 (Supplemental Fig. 6). Taken together, these results indicated that MI has the  
182 enzymatic activity and structure similar to wild type S<sub>3</sub>R.

183 To examine the *in vivo* function of MI, we transformed S<sub>3</sub>R and MI driven by the  
184 pistil-specific *Chip* promoter into SI *PhS<sub>3</sub>S<sub>3L</sub>* plants, respectively and also  
185 transformed their *FLAG*-tagged forms into *PhS<sub>3</sub>S<sub>3L</sub>*. For each construct, we identified  
186 at least 24 T<sub>0</sub> transgenic lines by PCR analysis (Supplemental Fig. 7 and 8) and  
187 showed that MI is expressed normally in the transgenic lines (Supplemental Fig. 9  
188 and 10A-C). Furthermore, self-pollination assays showed that each construct did not  
189 alter the SI phenotypes of the transgenic plants (Supplemental Table 1 and 2). To  
190 examine their roles in cross-pollination, we further identified several lines with  
191 similar transgene expression levels and found that, compared to about 398 seed set  
192 per capsule from *PhS<sub>3</sub>S<sub>3L</sub>* carrying the transgenic S<sub>3</sub>R (S<sub>3</sub>S<sub>3L</sub>/S<sub>3</sub>R-60) pollinated with  
193 cross pollen of *PhS<sub>V</sub>S<sub>V</sub>*, S<sub>3</sub>S<sub>3L</sub>/MI had a reduced seed set of 298 with a reduction of  
194 25% (Supplemental Fig. 10D and E and Supplemental Table 1). In consistent, we  
195 also found substantial reduction of seed sets derived from cross-pollination of the  
196 *FLAG*-tagged transgenic line S<sub>3</sub>S<sub>3L</sub>/MI-*FLAG*-24 (292 per capsule) with 30%  
197 reduction compared to 421 seeds per capsule from S<sub>3</sub>S<sub>3L</sub>/S<sub>3</sub>R-*FLAG*-34  
198 (Supplemental Fig. 10D and F and Supplemental Table 2). Taken together, these  
199 results suggested that the ubiquitinated R I is involved in cross-pollination.

200 To verify this role, we assessed the degradation rates of recombinant SUMO-His



201 tagged S<sub>3</sub>R and MI proteins by cell-free degradation assays. As shown in  
202 Supplemental Fig. 10G and H, SUMO-His tagged S<sub>3</sub>R degraded rapidly in the  
203 samples without MG132 and only 7% was remained after 10-minute treatment.  
204 However, the degradation rates were slightly decreased and about 24% remained  
205 after 10-minute treatment for SUMO-His-tagged MI protein, showing that MI  
206 degradation was partially inhibited and thus resulted in its accumulation in  
207 cross-pollen tubes. In addition, degradations of these proteins were significantly  
208 delayed by MG132 treatment, indicating the degradation of MI by the UPS pathway  
209 similar to wild type.

210 To confirm the role of the ubiquitinated R I in S-RNase degradation, we further  
211 performed ubiquitination assays and found that both polyubiquitinated His-tagged  
212 S<sub>3</sub>R and MI proteins were detected by anti-ubiquitin and -PhS<sub>3</sub>-RNase antibodies  
213 (Supplemental Fig. 11A), indicating that they both could be ubiquitinated by  
214 non-self SCF<sup>PhS<sub>3L</sub>SLF1</sup>. Nevertheless, the amount of ubiquitinated products of MI was  
215 reduced to 60% of S<sub>3</sub>R (Supplemental Fig. 11B), suggesting that the ubiquitinated  
216 residues located in R I are partially responsible for the ubiquitination of PhS<sub>3</sub>-RNase.  
217 Taken together, these results revealed that two ubiquitinated amino acids from R I  
218 are partially involved in PhS<sub>3</sub>-RNase degradation for cross-pollination.

219

## 220 **The R II from PhS<sub>3</sub>-RNase serves as a major region for its ubiquitination and** 221 **degradation in cross-pollen tubes**

222 To examine the function of three ubiquitinated amino acids from R II, we followed a  
223 similar strategy to that used for R I by creating MII with T153A, K154R and K217R  
224 substitutions of PhS<sub>3</sub>-RNase and found that its RNase activity increases with time  
225 similar to wild type (Fig. 2A), suggesting that it possesses normal ribonuclease  
226 activity. Second, we found that MII is also predominantly located in the pollen tube  
227 cytosol (Fig. 2B), capable of interacting with non-self PhS<sub>3L</sub>SLF1 (Fig. 2C-E), also  
228 with a weak interaction with self PhS<sub>3</sub>SLF1 (Supplemental Fig. 5) and had unaltered

229 structure and electrostatic potentials (Supplemental Fig. 6). Furthermore, *MII* and its  
230 *FLAG*-tagged transgenes were expressed normally in SI *PhS<sub>3</sub>S<sub>3L</sub>* plants and the  
231 transgenic lines also maintained SI phenotype (Fig. 2F-H and Supplemental Fig. 7-9  
232 and Supplemental Table 1 and 2). Compared to *MI* transgenic lines, a significant  
233 difference observed for *S<sub>3</sub>S<sub>3L</sub>/MII* was the seed sets derived from pollination with  
234 cross pollen of *S<sub>V</sub>S<sub>V</sub>* (ca. 75 seed sets per capsule), with a significant reduction of 81%  
235 compared with *S<sub>3</sub>S<sub>3L</sub>/S<sub>3R</sub>-60* (398 seed sets per capsule) (Fig. 2I and J and  
236 Supplemental Table 1). In consistent, compared to 421 seeds per capsule from  
237 *S<sub>3</sub>S<sub>3L</sub>/S<sub>3R</sub>-FLAG-34*, about 113 seeds were set for the *FLAG*-tagged transgenic lines  
238 with a significant 73% reduction (Fig. 2I and K and Supplemental Table 2). We  
239 further found that the *MII-FLAG* transgene leads to much less seed set per capsule  
240 compared with *MI-FLAG* when their protein levels are similar (Fig. 2H and K),  
241 indicating that the ubiquitinated R II plays a major role for cross-pollination.  
242 Furthermore, cell-free degradation assay showed that the degradation of MII protein  
243 mainly through the UPS pathway is severely inhibited compared with MI in  
244 cross-pollen tubes (Fig. 2L and Supplemental Fig. 10H) and *in vitro* ubiquitination  
245 assay showed the ubiquitination amount of MII with SCF<sup>PhS<sub>3L</sub>SLF1</sup> serving as E3 was  
246 significantly reduced to 40% of *S<sub>3R</sub>*, with a reduction of 20% more compared with  
247 MI (Supplemental Fig. 11). Taken together, these results suggested that R II of  
248 PhS<sub>3</sub>-RNase acts as a major ubiquitination region for its degradation resulting in  
249 cross-pollination.

250

### 251 **K154 and K217 from R II act as two major ubiquitination residues for** 252 **PhS<sub>3</sub>-RNase degradation in cross-pollen tubes**

253 To explore the function of three lysine (K103, K154 and K217) and two threonine  
254 (T102 and T153) residues of PhS<sub>3</sub>-RNase in its degradation, we designed two mutant  
255 constructs termed MK (K103R, K154R and K217R) and MT (T102A and T153A)  
256 which showed similar enzymatic activity, subcellular localization, SLF interactions,  
257 structure and electrostatic potentials to wild type *S<sub>3R</sub>* as well as normal pistil

258 expression and SI phenotype in SI *PhS<sub>3</sub>S<sub>3L</sub>* plants (Fig. 3A-I and Supplemental Fig.  
259 5-9 and Supplemental Table 1 and 2). However, *MK* and *MT* transgenic lines showed  
260 differential seed sets of 207 and 356 per capsule after pollination with cross pollen of  
261 *S<sub>V</sub>S<sub>V</sub>*, with a significant reduction of 48% and 15%, respectively, compared with  
262 *S<sub>3</sub>S<sub>3L</sub>/S<sub>3</sub>R-60* (398 seeds per capsule) (Fig. 3J and Supplemental Fig. 12A and  
263 Supplemental Table 1). In consistent, *S<sub>3</sub>S<sub>3L</sub>/MK-FLAG-16* set 113 seeds per capsule  
264 with a significant reduction of 73% and 66% more compared with  
265 *S<sub>3</sub>S<sub>3L</sub>/S<sub>3</sub>R-FLAG-34* (421 seeds per capsule) and *S<sub>3</sub>S<sub>3L</sub>/MT-FLAG-44* (334 seeds per  
266 capsule), respectively (Fig. 3K and Supplemental Fig. 12B and Supplemental Table  
267 2). In addition, we showed that compared with *MT* transgene, *MK* resulted in more  
268 seed set reduction similar to *MII* when the transgene expression levels are similar  
269 (Fig. 3I and K), suggesting that the identified lysine amino acids especially K154  
270 and K217 play a major role in the ubiquitination and degradation of PhS<sub>3</sub>-RNase.  
271 Furthermore, cell-free degradation assays showed that MK degradation by the 26S  
272 proteasome had been significantly delayed compared with MT in the absence of  
273 MG132 (Fig. 3L and M), and ubiquitination assays indicated that the lysine residues  
274 rather than threonine act as the major sites for the PhS<sub>3</sub>-RNase ubiquitination by  
275 non-self SCF<sup>PhS<sub>3L</sub>SLF1</sup> (Fig. 3N). Taken together, our results suggested that K154 and  
276 K217 from R II function as two major ubiquitination residues of PhS<sub>3</sub>-RNase for  
277 cross-pollination.

278

### 279 **R III functions as the second major ubiquitination region for PhS<sub>3</sub>-RNase** 280 **degradation allowing cross-pollination**

281 To investigate the function of the ubiquitination site C118 from the internal R III, we  
282 designed MIII (C118A) and found that it also maintains ribonuclease activity,  
283 subcellular localization and structure similar to wild type S<sub>3</sub>R (Supplemental Fig. 5,  
284 6 and 13). We further transformed *MIII* and its *FLAG*-tagged form into SI *PhS<sub>3</sub>S<sub>3L</sub>*  
285 plants and detected significantly reduced seed sets of about 160 and 261 per capsule  
286 from *S<sub>3</sub>S<sub>3L</sub>/MIII-84* and *S<sub>3</sub>S<sub>3L</sub>/MIII-FLAG-18* after pollination with cross pollen of

287  $S_V S_V$ , with a reduction of 59% and 38% compared with  $S_3 S_{3L} / S_3 R$ -60 and  
288  $S_3 S_{3L} / S_3 R$ -*FLAG*-34, respectively (Supplemental Fig. 7-9 and 14A-G and  
289 Supplemental Table 1 and 2). Furthermore, the average seed set per capsule was  
290 much less than  $S_3 S_{3L} / MI$ -*FLAG* when they showed similar transgene expression  
291 levels (Supplemental Fig. 14C, F and G), supporting a role of R III in the  
292 degradation of PhS<sub>3</sub>-RNase. In addition, we detected a marked accumulation of MIII  
293 in cross-pollen tubes compared with S<sub>3</sub>R and MI in the absence of MG132  
294 (Supplemental Fig. 10G, H and 14H) and a significant decreased ubiquitination  
295 amount similar to MII (Supplemental Fig. 11). Taken together, these results  
296 suggested that the R III acts as a second major ubiquitination region for the  
297 degradation of PhS<sub>3</sub>-RNase leading to cross-pollination.

298

### 299 **R I, II and III of PhS<sub>3</sub>-RNase function additively in its degradation for** 300 **cross-pollination**

301 To examine the function of the three ubiquitination regions together, we made  
302 MI/II/III (T102A, K103R, T153A, K154R, K217R and C118A). Similar to wild type  
303 PhS<sub>3</sub>-RNase, the mutant form exhibited normal physicochemical properties  
304 (Supplemental Fig. 5, 6 and 15) but resulted in 197 and 93 cross seeds per capsule  
305 derived from  $S_3 S_{3L} / MI/II/III$ -45 and  $S_3 S_{3L} / MI/II/III$ -*FLAG*-49 with pollen of  $S_V S_V$ ,  
306 respectively, a significant reduction of 50% and 77% similar to the lines containing  
307 the mutated R II (Fig. 4A-G and Supplemental Fig. 7-9 and Supplemental Table 1  
308 and 2). Furthermore, the degradation of MI/II/III in cross-pollen tubes was strongly  
309 inhibited in 40 min in the absence of MG132 (Fig. 4H and I), indicating a  
310 significantly reduced ubiquitination by SCF<sup>PhS<sub>3L</sub>SLF1</sup> (Fig. 4J). Taken together, these  
311 results suggested that the degradation of PhS<sub>3</sub>-RNase is largely dependent on an  
312 additive role of its three ubiquitination regions for cross-pollination.

313

### 314 **DISCUSSION**

315 Previous studies have shown that non-self S-RNases are collaboratively recognized  
316 by multiple non-self SLFs leading to the formation of canonical SCF<sup>SLF</sup> complexes  
317 for their ubiquitination and subsequent degradation by the 26S proteasome resulting  
318 in cross-pollination, but the ubiquitination linkage type and site remain unclear. In  
319 this study, we have found that non-self S-RNase is mainly polyubiquitinated through  
320 K48 linkages by SCF<sup>SLF</sup> at three spatial regions (R I, II and III) in *P. hybrida*.  
321 Among them, R I ubiquitination appears to occur before S-RNase uptake into pollen  
322 tubes with a minor role, if any, in cross-pollen tubes, whereas R II and III act as two  
323 major ubiquitination regions for S-RNase degradation. Based on our results, we  
324 propose a stepwise UPS model for S-RNases cytotoxicity restriction allowing  
325 cross-pollination in *P. hybrida* (Fig. 5). In this model, both self and non-self  
326 S-RNases with a small fraction of R I ubiquitinated forms likely mediated by an  
327 unknown E3 ligase are taken up into the cytosols of either self- or cross-pollen tubes.  
328 Firstly, the R I ubiquitinated forms would make them unable to be recognized by  
329 SLFs but degraded by the 26S proteasome. Secondly, other S-RNases could be  
330 recognized by SLFs on the basis of ‘like charges repel and unlike charges attract’,  
331 and the like electrostatic potentials together with other unknown forces between self  
332 S-RNase and its cognate SLF would result in formation of non-functional SCF<sup>SLF</sup>  
333 complexes as demonstrated previously (Li et al., 2017), whereas non-self S-RNase  
334 would be attracted by unlike electrostatic potentials and other unknown factors and  
335 polyubiquitinated by functional SCF<sup>SLF</sup> complexes at R II leading to its degradation  
336 by the 26S proteasome. Thirdly, the internal R III of non-self S-RNase could be  
337 exposed by a conformational change for its further ubiquitination by SLFs and  
338 degradation resulting in cross-pollination. Our studies have revealed that the  
339 ubiquitination and degradation of non-self S-RNases depend on at least three regions  
340 with distinct ubiquitination sites including lysine, threonine and cysteine, reinforcing  
341 the notion that the restriction of S-RNase cytotoxicity occurs mainly by the  
342 ubiquitination-mediated degradation mechanism (Liu et al., 2014).

343 Nevertheless, the underlying mechanisms of R I and III ubiquitination remain to

344 be further elucidated. Notably, newly synthesized secretory proteins are constantly  
345 scrutinized and destructed by the quality control system such as ER-associated  
346 degradation (ERAD) or autophagy to maintain proteostasis once they are misfolded  
347 or aggregated (Anelli and Sitia, 2008). The ubiquitination of R I in the unpollinated  
348 pistils suggested that it might be resulted from the polyubiquitination of misfolded  
349 PhS<sub>3</sub>-RNases. Ubiquitination of closely spaced residues is predicted to be important  
350 for polyubiquitin chain assembly (Wang et al., 2012). Here, we found that the  
351 identified threonine ubiquitination residues paired with lysine also contribute to the  
352 ubiquitination and degradation of non-self S-RNase for cross-pollination, suggesting  
353 that they may play a role in building polyubiquitin chains long enough for  
354 proteasome recognition (Thrower et al., 2000). In addition, ubiquitin often serves as  
355 a critical signal governing the membrane traffic system. Monoubiquitination is  
356 sufficient to initiate the internalization of plasma membrane proteins, and  
357 K63-linked polyubiquitination is frequently involved in their subsequent sorting and  
358 trafficking (Paez Valencia et al., 2016). It is thus possible that R I could also be  
359 monoubiquitinated leading to S-RNase entry into pollen tubes by endocytosis,  
360 consistent with our results showing that a small fraction of S-RNases are sequestered  
361 in microsome fractions. As for the internal R III, it is possible that it would be  
362 ubiquitinated unless exposed. Thus, the ubiquitination of R II might lead to the  
363 conformational change of non-self S-RNase and exposure of R III, and the  
364 subsequent ubiquitination of R III would further block the enzymatic activity of the  
365 S-RNase (Sagar et al., 2007). Previous simulations demonstrated that the conserved  
366 complementary electrostatic patterns and hydrophobic patches of Rpn10, a  
367 recognition subunit of proteasome, and K48-linked tetraubiquitin of the substrates  
368 are critical for their interaction (Zhang et al., 2016). Likewise, the ubiquitination of  
369 R III might further enhance the electrostatic potentials and hydrophobicity to  
370 strengthen the recognition of ubiquitinated S-RNase by the proteasome as well as its  
371 degradation.

372 It remains unclear why the additive action of the three regions did not completely

373 restrict non-self S-RNase cytotoxicity in cross-pollen tubes. We suggest that there  
374 might be additional mechanism (s) occurring either after the R III-mediated  
375 ubiquitination of non-self S-RNase or during S-RNase uptake into pollen tubes by  
376 endocytosis. In *Nicotiana*, S-RNases appeared to be sequestered early in vacuole but  
377 released out late to the cytosol in self-pollen tubes (Goldraj et al., 2006). In *P.*  
378 *hybrida*, a small amount of S-RNases are detected in the microvesicles of pollen  
379 tubes (Liu et al., 2014). Together, these findings suggest that S-RNase  
380 compartmentalization could function during an early phase of S-RNase action.  
381 Further investigation into S-RNase uptake mechanism would provide answer to this  
382 possibility.

383 T2 RNases are widespread in every organism except Archaea and involved in a  
384 variety of biological processes, including phosphate starvation, viral infection,  
385 self-fertilization, tumor growth control and cell death (Bariola et al., 1994; Löffler et  
386 al., 1992; Meyers et al., 1999; Ramanauskas and Igić, 2017; Thompson and Parker,  
387 2009). However, our understanding of their functions remains largely incomplete,  
388 especially in the case where their roles appear to be independent of their enzymatic  
389 activity. In *Saccharomyces cerevisiae*, T2 RNase Rny1 can be released from the  
390 vacuole to cleave tRNA and rRNA under superoxygen stress (Thompson and Parker,  
391 2009). Rny1 is indispensable for cell viability, but overexpressed Rny1 can act as a  
392 cytotoxin during oxidative stress (MacIntosh et al., 2001; Thompson and Parker,  
393 2009). Moreover, its inactivation strikingly has no effects on cell viability  
394 (MacIntosh et al., 2001), but the underlying mechanism remains elusive. In human,  
395 RNASET2 is not only implicated to regulate neurodevelopment downstream  
396 immune response, but also serve as a tumor suppresser (Henneke et al., 2009),  
397 whereas how it contributes to this process in a cleavage-independent manner is  
398 poorly defined. In addition, the catalytic-independent function of T2 RNase has also  
399 been confirmed for ACTIBIND from *Aspergillus niger* that can bind and destroy the  
400 normal actin networks, which is supposed to be conserved in other T2 RNase family  
401 members including S-RNase (Roiz et al., 2006). Thus, T2 RNase may act as a

402 molecular signal mediating multiple biological settings, revealing that diverse T2  
403 RNase roles could be derived through neofunctionalization in these lineages.

404 Distinct from S-RNase-based SI widely present in Solanaceae, Rosaceae,  
405 Plantaginaceae and Rutaceae, SI in Brassicaceae and Papaveraceae is  
406 well-characterized with a signaling transduction pathway stimulated by the  
407 self-recognition between the pistil and pollen *S* determinants. In Brassicaceae, the  
408 binding between the pollen-specific SCR/SP11 and its cognate pistil-specific SRK  
409 can induce homodimerization and autophosphorylation of SRK, thus triggering the  
410 phosphorylation and activation of MLPK to further promote the  
411 phosphorylation-mediated recruitment of ARC1 E3 ligase. Consequently, the SI  
412 inhibitors or SC factors like EXO70A1 are ubiquitinated and degraded leading to  
413 self-pollen rejection (Samuel et al., 2009). The SI-induced signaling in *P. rhoeas* is  
414 mainly focused on the initiation of PCD. During the early period after  
415 self-pollination, an influx of Ca<sup>2+</sup> and K<sup>+</sup> is stimulated, triggering a signaling  
416 cascade including phosphorylation and inactivation of Pr-26.1a/b, phosphorylation  
417 and activation of p56, F-actin depolymerization and increased ROS and NO (Wilkins  
418 et al., 2014). Among them, the disrupted cytoskeleton dynamic serves as a major  
419 cause of PCD (Thomas et al., 2006), which is also proposed to occur in self-pollen  
420 tubes of *Pyrus bretschneideri* (Chen et al., 2018). Yang et al. (2018) reported an  
421 S-RNase-mediated actin disruption in apple (*Malus×domestica*) (Yang et al., 2018).  
422 Moreover, self S-RNase can disrupt Ca<sup>2+</sup> gradient at pollen tube apex through  
423 inhibiting phospholipase C (PLC) (Qu et al., 2017). In addition, heat-inactivated  
424 S-RNase surprisingly exerts a more sever inhibition of pollen tubes (Gray et al.,  
425 1991). These studies suggest that S-RNase could function in a signaling pathway  
426 independent of its enzymatic activity. Our results indicated that self S-RNase could  
427 be partially ubiquitinated extracellularly to be destroyed during its uptake, but we  
428 can not rule out the possibility that its ubiquitination could act as an initial signal for  
429 SI response. In addition to ubiquitination, a recent study in *Solanum chacoense*  
430 showed that the numbers of carbohydrate chains of S-RNases may influence pollen



431 rejection threshold of S-RNase (Liu et al., 2008). As phosphorylation serves as a  
432 critical modification modulating multiple cellular events, it may also be involved in  
433 S-RNase activity regulation and the downstream signaling transduction in  
434 Solanaceae-type SI. Besides, previous studies have shown that there should exist  
435 other factors except electrostatic potentials contribute to the recognition between  
436 SLF and S-RNase (Li et al., 2017). Thus, future studies on the structure of SLF  
437 bound to S-RNase, other post-translational modifications such as glycosylation and  
438 phosphorylation of S-RNase and their relationships with its ubiquitination should  
439 shed light on how S-RNase functions and stimulates downstream signaling networks  
440 in the pollen tubes.

441 In sum, our results have revealed a novel stepwise UPS mechanism for S-RNase  
442 cytotoxicity restriction resulting in cross-pollination in *P. hybrida*. Our findings also  
443 indicate a possible mechanism for dynamic regulation of secreted cytotoxin activities  
444 including other T2 ribonuclease members. Further validation of this mechanism  
445 using biochemical and cytological approaches is expected to provide additional  
446 insights into T2 RNase neofunctionalization.

447

## 448 **METHODS**

### 449 **Plant materials**

450 Self-incompatible wild-type lines of *PhS<sub>3</sub>S<sub>3</sub>*, *PhS<sub>v</sub>S<sub>v</sub>* and *PhS<sub>3</sub>S<sub>3L</sub>* have been  
451 previously described (Robbins *et al.*, 2000; Sims and Ordanic, 2001). The transgenic  
452 plants *PhS<sub>3</sub>S<sub>3L</sub>/PhS<sub>3L</sub>SLF1-FLAG* were constructed by transforming *PhS<sub>3</sub>S<sub>3L</sub>* with  
453 *pBII01-PhS<sub>3A</sub>-SLF::PhS<sub>3L</sub>SLF1-FLAG*. *PhS<sub>3A</sub>-SLF* is a native promoter used for  
454 *PhSLFs* expression as previously described (Liu *et al.*, 2014; Qiao *et al.*, 2004a).

### 455 **Ti plasmid construction and transgenic plant generation**

456 *PhS<sub>3</sub>-RNase* cDNA and its *FLAG*-tagged form were amplified by primers listed in  
457 Supplemental Table 3 to introduce *XhoI* and *SacI* restriction sites at their 5' and 3'  
458 end, respectively. *PhS<sub>3</sub>-RNase* point mutations were generated by PCR (Polymerase  
459 chain reaction) using site-directed mutagenesis primers listed in Supplemental Table  
460 3 with *pEASY-PhS<sub>3</sub>-RNase* or *pEASY-PhS<sub>3</sub>-RNase-FLAG* construct as the template.  
461 *MI* was generated by mutating T102 and K103 into alanine and arginine, *MII* T153  
462 and K154 into alanine and arginine, and K217 into arginine, *MIII* C118 into alanine,  
463 *MK* K103, K154 and K217 into arginine, *MT* T102 and T153 into alanine on  
464 *PhS<sub>3</sub>-RNase*, *MI/II/III* T102, K103 and C118 into alanine, arginine and alanine,  
465 respectively on *MII*. The *GUS* gene of *pBII01* was removed using double-digestion,  
466 and the pistil-specific promoter *Chip* was ligated into *pBII01* by *KpnI* and *XhoI*.  
467 *PhS<sub>3</sub>-RNase-(FLAG)* and its six mutant (m) forms were digested with *XhoI* and *SacI*  
468 and inserted into *pBII01* containing *Chip* promoter to generate  
469 *pBII01-Chip::PhS<sub>3</sub>-RNase-(FLAG)* and *pBII01-Chip::PhS<sub>3</sub>-RNase (m)-(FLAG)*. The  
470 vectors were separately electroporated into *Agrobacterium tumefaciens* strain  
471 LBA4404 and introduced into *PhS<sub>3</sub>S<sub>3L</sub>* using the leaf disk transformation method  
472 described previously (Lee *et al.*, 1994; Qiao *et al.*, 2004a).

### 473 **Protein structure prediction and electrostatic potential analysis**

474 *PhS<sub>3</sub>-RNase* protein structure was modeled by the I-TASSER server  
475 (<http://zhanglab.ccmb.med.umich.edu/I-TASSER/>) according to the instructions

476 (Yang et al., 2015; Li et al., 2017). Among the top five models generated by iterative  
477 simulations, the first one was selected for further analysis based on model quality  
478 evaluation using the VADAR version1.8 program (<http://vadar.wishartlab.com>)  
479 (Willard et al., 2003) and the ProSa-web program  
480 (<https://prosa.services.came.sbg.ac.at/prosa.php>)(Wiederstein and Sippl, 2007).  
481 Structures of point-mutated S-RNases were generated by Mutagenesis in PyMol.  
482 Electrostatic potential analysis of PhS<sub>3</sub>-RNase structure and its point-mutated ones  
483 were performed using plug-in APBS tools in PyMol as previously described (Baker  
484 et al., 2001; Li et al., 2017).

#### 485 **Quantitative (q) RT-PCR analysis**

486 Total RNAs were separately isolated from pistils derived from *PhS<sub>3</sub>S<sub>3L</sub>/PhS<sub>3</sub>-RNase-*,  
487 */MI-*, */MII-*, */MK-*, */MT-*, */MIII-* and */MI/II/III-(FLAG)* using TRIzol reagent (Ambion)  
488 according to the manufacturer's instructions. cDNA was subsequently synthesized  
489 using TransScript-uni one-Step gDNA removal and cDNA synthesis supermix  
490 (Transgen, AU311-02). qRT-PCR reaction mixes were prepared according to  
491 manufacturer's guidelines of ChamQ<sup>TM</sup> Universal SYBR qPCR Master Mix  
492 (Vazyme, Q711-02/03). Relevant primer sequences are listed in Supplemental Table  
493 3. qRT-PCR assays were performed by CFX96<sup>TM</sup> Real-Time System (Bio-Rad). *P.*  
494 *hybrida 18S rRNA* gene transcripts were used as an internal control. The data were  
495 analyzed with the method of Livak ( $2^{-\Delta\Delta Ct}$ ) (Livak and Schmittgen, 2001).

#### 496 **Mass spectrometry analysis for ubiquitination sites**

497 The wild type self-incompatible *PhS<sub>3</sub>S<sub>3L</sub>* plants were self-pollinated or  
498 cross-pollinated with the pollen from the transgenic self-compatible plants  
499 *PhS<sub>3</sub>S<sub>3L</sub>/PhS<sub>3L</sub>SLF1*. Then 25 pollinated pistils were collected after 2, 6, 12 and 24 h,  
500 respectively. The pollinated pistils of the four time points were then mixed up,  
501 minced with liquid nitrogen and lysed in lysis buffer containing 7 M urea, 2 M  
502 thiourea and 0.1% CHAPS, followed by 5-minute ultrasonication on ice. Samples of  
503 unpollinated pistils were prepared as controls using the same strategy. The lysate was

504 centrifuged at 14,000 g for 10 min at 4°C and the supernatant was transferred to a  
505 clean tube. Extracts from each sample were reduced with 10 mM DTT for 1 h at  
506 56°C, and subsequently alkylated with sufficient iodoacetamide for 1 h at room  
507 temperature in the dark (Udeshi et al., 2013b). The supernatant from each sample  
508 containing precisely 10 mg of protein was digested with Trypsin Gold (Promega) at  
509 1:50 enzyme-to-substrate ratio. After 16 h of digestion at 37°C, peptides were  
510 desalted with C18 cartridge to remove the high urea, and desalted peptides were  
511 dried by vacuum centrifugation (Udeshi et al., 2013b). The lyophilized peptides were  
512 resuspended with MOPS IAP buffer (50 mM MOPS, 10 mM KH<sub>2</sub>PO<sub>4</sub> and 50 mM  
513 NaCl) adjusting to pH 7.0 with 1 M Tris, and centrifuged for 5 min at 12,000 g.  
514 Supernatants were mixed with anti-Ubiquitin Remnant Motif (K-ε-GG) beads (CST  
515 #5562, Cell Signaling Technology) for 2.5 h at 4°C, and then centrifuged for 30 s at  
516 3,000 g at 4°C. Beads were washed in MOPS IAP buffer, then in water, prior to  
517 elution of the peptides with 0.15% TFA (Udeshi et al., 2013a). Then the peptides  
518 were desalted using peptide desalting spin columns (Thermo Fisher, 89852) before  
519 LC-MS/MS analysis on the Orbitrap Fusion mass spectrometer (Thermo Fisher). The  
520 resulting spectra from each fraction were searched separately against S-RNase amino  
521 acid sequences by the Maxquant search engines. Precursor quantification based on  
522 intensity was used for label-free quantification.

### 523 **S-RNase activity assays**

524 The coding sequence of *PhS<sub>3</sub>-RNase* (without signal peptide) as well as its six  
525 mutant forms described above were separately cloned into *pCold-TF* vector (Takara).  
526 Relevant primer sequences are listed in Supplemental Table 3. Trigger Factor (TF) is  
527 a 48 kDa soluble tag located at the N-terminus of His. The His-tagged fusion  
528 proteins were respectively expressed in *Escherichia coli Trans* BL21 (DE3) plysS  
529 (Transgen) at 16°C for 24 h at 180 rpm, and then immobilized on Ni Sepharose 6  
530 Fast Flow beads (GE Healthcare, 10249123) according to the manufacturer's  
531 instructions. The beads were subsequently washed with wash buffer (25 mM pH 8.0  
532 Tris-HCl, 150 mM NaCl, 15 mM imidazole), followed by an elution using buffer

533 containing 25 mM pH 8.0 Tris-HCl, 150 mM NaCl, 250 mM imidazole. Protein  
534 concentration was determined by Bradford protein assay. The purified recombinant  
535 proteins were separately added into the tubes containing lyophilized fluorescent  
536 substrate according to the manufacture's instructions of RNase Alert Lab Test Kit  
537 (Ambion). Each samples were then pipetted into a 96-well plate and incubated in  
538 Synergy 2 (Biotech) at 37°C. The relative fluorescence units (RFU) was monitored at  
539 5 min intervals for 2 h with 490 nm/520 nm excitation/emission wavelengths.

#### 540 **Ubiquitination assay and immunoblotting**

541 The SCF<sup>SLF-FLAG</sup> complex attached to anti-FLAG M2 affinity gel (Sigma-Aldrich)  
542 serving as E3 ubiquitin ligase was purified from transgenic pollen tubes of  
543 *PhS<sub>3</sub>S<sub>3L</sub>/PhS<sub>3L</sub>SLF1-FLAG* as described (Li et al., 2017), with that from wild type  
544 *PhS<sub>3</sub>S<sub>3L</sub>* as a negative control. PhS<sub>3</sub>-RNase was purified from pistils of *PhS<sub>3</sub>S<sub>3</sub>*  
545 through Fast Protein Liquid Chromatography (FPLC) as described (Entani et al.,  
546 2014; Li et al., 2017), and recombinant His-PhS<sub>3</sub>-RNase and its six mutant forms  
547 described above was separately used as a substrate and added into mixture  
548 containing E1, E2, E3 on anti-FLAG gel, biotinylated ubiquitin and ATP for  
549 ubiquitination reaction (Li et al., 2017). After incubated at 37°C for 6 h, reaction was  
550 quenched by an addition of 2 × Non-reducing gel loading buffer (ChemCruz, B1919)  
551 and centrifuged at 6,000 g for 30 s. Supernatants were separated by 12% SDS-PAGE,  
552 transferred to PVDF (Millipore) and probed by primary antibodies including mouse  
553 monoclonal anti-PhS<sub>3</sub>-RNase, anti-ubiquitin (Abgent), and anti-His (Sigma)  
554 antibodies at a 1:2000 dilution, respectively. The PVDF membranes were washed  
555 with TBS-T buffer, followed an incubation with secondary antibody horseradish  
556 peroxidase (HRP)-conjugated goat anti-mouse IgG (Sigma) at a 1:10,000 dilution.  
557 Then the PVDF membrane were washed again with TBS-T buffer, and then the HRP  
558 signal were detected by Image Quant LAS4000 or Tanon5800 after incubated with  
559 Immoblion Western Chemiluminescent HRP substrate (Millipore). Image J was used  
560 to quantify the ubiquitinated recombinant His-PhS<sub>3</sub>-RNase (or its mutant forms)  
561 fusion proteins. K48- or K63-linkage Specific Polyubiquitin Rabbit mAb (Cell

562 Signaling) at a 1:1000 dilution and the corresponding secondary antibody  
563 horseradish peroxidase (HRP)-conjugated goat anti-rabbit IgG (Sigma) at a 1:10,000  
564 dilution were used to analyze the linkage type of PhS<sub>3</sub>-RNase ubiquitination.

#### 565 **Subcellular fractionation and immunoblotting**

566 Mature pollen grains of *PhS<sub>V</sub>S<sub>V</sub>* were suspended and cultured in liquid pollen  
567 germination medium (LPGM) as described (Liu et al., 2014) for 2-3 h, and then  
568 collected by centrifugation at 1,000 g for 2 min with the supernatant discarded.  
569 Styler lysates extracted from transgenic pistils containing PhS<sub>3</sub>-RNase-FLAG or its  
570 six mutant forms by fresh LPGM were separately used to further incubate the  
571 collected pollen tubes. After cultured for 1 h, the treated pollen tubes were harvested  
572 for fractionation and equal amount of protein samples derived from each step of  
573 centrifugation were applied to immunoblotting as described (Liu et al., 2014).

#### 574 **Cell-free degradation assays**

575 Germinated pollen tubes of *PhS<sub>V</sub>S<sub>V</sub>* were collected and ground into fine powder in  
576 liquid nitrogen. Then total proteins were extracted on ice using cell-free degradation  
577 buffer containing 25 mM Tris-HCl (pH 7.5), 10 mM NaCl, 10 mM MgCl<sub>2</sub>, 1 mM  
578 DTT, 10 mM ATP and 1 mM PMSF, followed with a centrifugation at 12,000 g at 4°C  
579 for 15 min. The supernatants were subsequently quantified by Bradford method and  
580 equal amount of total proteins were applied to react with recombinant  
581 SUMO-His-PhS<sub>3</sub>-RNase or its mutant forms in the presence or the absence of 40 μM  
582 MG132. During incubation at 30°C, equal amount of samples were taken out at  
583 indicated time points to detect SUMO-His-tagged protein abundance through  
584 immunoblotting. Image J was used to quantify the results. The SUMO-His-tagged  
585 fusion proteins were generated as follows. The coding sequence of *PhS<sub>3</sub>-RNase*  
586 (without signal peptide) as well as its six mutant forms described above were  
587 separately cloned into engineered *pET-30a* (Novagen) containing N-terminal SUMO  
588 tag to produce SUMO-His-tagged proteins. Relevant primer sequences are listed in  
589 Supplemental Table 3. The fusion proteins were respectively expressed in

590 *Escherichia coli* Trans BL21 (DE3) plysS (Transgen) at 16°C for 24 h, and then  
591 immobilized on Ni Sepharose 6 Fast Flow beads (GE Healthcare, 10249123). The  
592 beads were subsequently washed and eluted by buffers as described above.

### 593 **MBP pull-down assays**

594 The coding sequences of *PhS<sub>3</sub>-RNase* (without signal peptide) and its six mutant  
595 forms were separately cloned into *pMAL-c2x* (Novagen) to generate MBP-tagged  
596 fusion proteins. The full length of *PhS<sub>3L</sub>SLF1* was cloned into engineered *pET-30a*  
597 (Novagen) described above to produce SUMO-His-PhS<sub>3L</sub>SLF1. Relevant primer  
598 sequences are listed in Supplemental Table 3. All the recombinant proteins were  
599 induced overnight at 16°C at 180 rpm, with MBP-tagged proteins expressed in *E.*  
600 *coli* Trans BL21 (DE3) plysS cells described above and SUMO-His-PhS<sub>3L</sub>SLF1 in *E.*  
601 *coli* Trans BL21 (DE3) (Transgen). Cells were subsequently collected and  
602 resuspended using binding buffer [20 mM Tris-HCl (pH 8.0), 200 mM NaCl, 1 mM  
603 DTT and 1 mM EDTA (pH 8.0)] for ultrasonication on ice. Then the lysates  
604 containing SUMO-His-PhS<sub>3L</sub>SLF1 were divided into seven equal aliquots and  
605 rotarily incubated with the same amount of lysates containing MBP or MBP-tagged  
606 fusion protein (PhS<sub>3</sub>-RNase or its six mutant forms), respectively for 2 h at 4°C. The  
607 mixed lysates were subsequently immobilized on Dextrin Sepharose High  
608 Performance (GE heathcare, 10284602) following the manufacturer's instructions.  
609 Then the beads were washed with binding buffer and eluted by binding buffer  
610 supplemented with 10 mM maltose. The elutes were separated by 12% SDS-PAGE  
611 and subjected to immunoblotting using anti-MBP (NEB) and anti-His (Sigma)  
612 antibodies.

### 613 **Bimolecular fluorescence complementation (BiFC) assays**

614 The coding sequences of *PhS<sub>3</sub>-RNase* (without signal peptide) and its six mutant  
615 forms were separately amplified and inserted into *pSY-735-35S-cYFP-HA* and the  
616 full-length cDNA of *PhS<sub>3L</sub>SLF1* was cloned into *pSY-736-35S-nYFP-EE* as  
617 described (Li et al., 2018). Relevant primer sequences are demonstrated in

618 Supplemental Table 3. Different types of constructs (e.g., *nYFP-PhS<sub>3L</sub>SLF1* and  
619 *cYFP-PhS<sub>3</sub>-RNase*), together with *p19* silencing plasmid, were cotransfected into  
620 tobacco leaf epidermal cells by *Agrobacterium* (GV3101)-mediated infiltration to  
621 generate fusion proteins (e.g., *nYFP-PhS<sub>3L</sub>SLF1* and *cYFP-PhS<sub>3</sub>-RNase*) for their  
622 interaction test. After cultured another 48 h in the dark, a portion of the injected leaf  
623 was cut off and subjected to confocal microscope (Zeiss LSM710) to capture the  
624 YFP signal.

### 625 **Split firefly luciferase complementation (SFLC) assays**

626 The coding sequence of *PhS<sub>3L</sub>SLF1* (or *PhS<sub>3</sub>SLF1*) and *PhS<sub>3</sub>-RNase* (or its mutant  
627 forms) were cloned into *pCAMBIA1300-35S-HA-nLUC-RBS* and  
628 *pCAMBIA1300-35S-cLUC-RBS* vectors, respectively, as described (Liu *et al.*, 2018).  
629 Relevant primer are listed in Supplemental Table 3. Then different construct  
630 combinations (e.g., *PhS<sub>3L</sub>SLF1-nLUC* and *cLUC-PhS<sub>3</sub>-RNase*) together with *p19*  
631 silencing plasmid were cotransfected into tobacco leaf epidermal cells via GV3101  
632 described above. After 48 h in the dark, 1 mM luciferin was sprayed on the injected  
633 leaves with a 5-minute dark incubation. Then capture the LUC signal using a cooled  
634 CCD imaging system (Berthold, LB985).

### 635 **Aniline blue staining of pollen tubes within pistils**

636 After self-pollination of wild-type plant *PhS<sub>3</sub>S<sub>3L</sub>* and transgenic lines containing  
637 *PhS<sub>3L</sub>SLF1-FLAG*, the pollinated pistils were collected and chemically fixed in  
638 ethanol : glacial acetic acid (3:1) solution for 24 h at 4°C. Then treat the pistils  
639 sequentially with 8 N sodium hydroxide, water and aniline blue solution to stain the  
640 pollen tubes within pistils for observation as described (Liu *et al.*, 2014).

### 641 **Accession numbers**

642 Sequence data presented in Supplemental Figure 3 can be found in the GenBank data  
643 library under the following accession numbers: *Petunia hybrida* S<sub>3</sub>-RNase (U07363),  
644 PhS<sub>3L</sub>-RNase (AJ271065), PhS<sub>V</sub>-RNase (AJ271062), *Pyrus bretschneideri* S<sub>7</sub>-RNase



645 (XM\_009350009), *Petunia inflata* S<sub>2</sub>-RNase (AAG21384), PiS<sub>3</sub>-RNase  
646 (AAA33727), PiS<sub>k1</sub>-RNase (BAE73275), PiS<sub>1</sub>-RNase (AAA33726), *Solanum*  
647 *lycopersicum* S<sub>3</sub>-RNase (XP\_004229063), *Nicotiana alata* S<sub>A2</sub>-RNase (AAA87045),  
648 PhS<sub>X</sub>-RNase (AAA33729), *Petunia axillaris* S<sub>C2</sub>-RNase (AAN76454), *Solanum*  
649 *tuberosum* S<sub>2</sub>-RNase (Q01796), PhS<sub>B2</sub>-RNase (BAA76514), *Solanum neorickii*  
650 S-RNase (BAC00940), *Solanum habrochaites* S<sub>2</sub>-RNase (AIG62995), *Solanum*  
651 *chilense* S<sub>1</sub>-RNase (BAC00934), *Solanum chacoense* S<sub>11</sub>-RNase (AAA50306),  
652 ScS<sub>14</sub>-RNase (AAF36980), NaS<sub>7</sub>-RNase (Q40381), PaS<sub>C1</sub>-RNase (AAN76453),  
653 PhS<sub>11</sub>-RNase (BAJ24848), PhS<sub>7</sub>-RNase (BAJ24847), PaS<sub>1</sub>-RNase (AAK15435),  
654 ShS<sub>4</sub>-RNase (AIG62997), PhS<sub>1</sub>-RNase (AAA60465), PhS<sub>B1</sub>-RNase (BAA76513),  
655 *Solanum peruvianum* S<sub>22</sub>-RNase (BAC00930), SpS<sub>12</sub>-RNase (AAA77040),  
656 ShS<sub>1</sub>-RNase (AIG62994), PhS<sub>0</sub>-RNase (ACT35737), ScS<sub>12</sub>-RNase (AAD56217),  
657 NaS<sub>6</sub>-RNase (AAB40028), SpS<sub>3</sub>-RNase (CAA53666), SpS<sub>11</sub>-RNase (AAA77039),  
658 NaS<sub>2</sub>-RNase (P04007), and PaS<sub>13</sub>-RNase (AAK15436).

659

## 660 **DISCLOSURE DECLARATION**

661 The authors declare that they have no conflict of interest.

662

## 663 **ACKNOWLEDGMENTS**

664 This work was supported by the Strategic Priority Research Program of the Chinese  
665 Academy of Sciences (XDB27010302) and the National Natural Science Foundation  
666 of China (32030007).

667

## 668 **AUTHOR CONTRIBUTIONS**

669 Y.X conceived and designed the project. H.Z. and Y.S. performed the experiments.  
670 J.L. and Y.Z. conducted functional analyses of *PhS<sub>3L</sub>SLF1*. H.H. assisted transgenic  
671 plant construction. Q.L. and Y.E.Z. provided technical support. H.Z. and Y.X.

672 analyzed data and wrote the manuscript. All authors commented on the article.

673

## 674 REFERENCES

- 675 **Anelli, T., and Sitia, R.** (2008). Protein quality control in the early secretory  
676 pathway. *EMBO J.* **27**, 315-327.
- 677 **Baker, N.A., Sept, D., Joseph, S., Holst, M.J., and McCammon, J.A.** (2001).  
678 Electrostatics of nanosystems: application to microtubules and the ribosome.  
679 *Proc. Natl. Acad. Sci. U.S.A.* **98**, 10037-10041.
- 680 **Bariola, P.A., Howard, C.J., Taylor, C.B., Verburg, M.T., Jaglan, V.D., and**  
681 **Green, P.J.** (1994). The Arabidopsis ribonuclease gene RNS1 is tightly  
682 controlled in response to phosphate limitation. *Plant J.* **6**, 673-685.
- 683 **Chen, J., Wang, P., de Graaf, B.H.J., Zhang, H., Jiao, H., Tang, C., Zhang, S.,**  
684 **and Wu, J.** (2018). Phosphatidic acid counteracts S-RNase signaling in  
685 pollen by stabilizing the actin cytoskeleton. *Plant Cell* **30**, 1023-1039.
- 686 **De Nettancourt, D.** (2001). Incompatibility and incongruity in wild and cultivated  
687 plants. Berlin: Springer-Verlag 10.1007/978-3-662-04502-2.
- 688 **Entani, T., Kubo, K.I., Isogai, S., Fukao, Y., Shirakawa, M., Isogai, A., and**  
689 **Takayama, S.** (2014). Ubiquitin-proteasome-mediated degradation of  
690 S-RNase in a solanaceous cross-compatibility reaction. *Plant J.* **78**,  
691 1014-1021.
- 692 **Fujii, S., Kubo, K.I., and Takayama, S.** (2016). Non-self- and self-recognition  
693 models in plant self-incompatibility. *Nat. Plants* **2**, 16130.
- 694 **Goldraij, A., Kondo, K., Lee, C.B., Hancock, C.N., Sivaguru, M.,**  
695 **Vazquez-Santana, S., Kim, S., Phillips, T.E., Cruz-Garcia, F., and**  
696 **McClure, B.** (2006). Compartmentalization of S-RNase and HT-B  
697 degradation in self-incompatible *Nicotiana*. *Nature* **439**, 805-810.
- 698 **Gray, J.E., McClure, B.A., Bonig, I., Anderson, M.A., and Clarke, A.E.** (1991).  
699 Action of the style product of the self-incompatibility gene of *Nicotiana*  
700 *alata* (S-RNase) on in vitro-grown pollen tubes. *Plant Cell* **3**, 271-283.
- 701 **Henneke, M., Diekmann, S., Ohlenbusch, A., Kaiser, J., Engelbrecht, V.,**  
702 **Kohlschütter, A., Krätzner, R., Madruga-Garrido, M., Mayer, M., Opitz,**  
703 **L., et al.** (2009). RNASET2-deficient cystic leukoencephalopathy resembles  
704 congenital cytomegalovirus brain infection. *Nat. Genet.* **41**, 773-775.
- 705 **Hua, Z., and Kao, T.H.** (2008). Identification of major lysine residues of S<sub>3</sub>-RNase

- 706 of *Petunia inflata* involved in ubiquitin-26S proteasome-mediated  
707 degradation in vitro. *Plant J.* **54**, 1094-1104.
- 708 **Huang, J., Zhao, L., Yang, Q., and Xue, Y.** (2006). AhSSK1, a novel SKP1-like  
709 protein that interacts with the S-locus F-box protein SLF. *Plant J.* **46**,  
710 780-793.
- 711 **Kubo, K.I., Entani, T., Takara, A., Wang, N., Fields, A.M., Hua, Z., Toyoda, M.,**  
712 **Kawashima, S.I., Ando, T., Isogai, A., et al.** (2010). Collaborative non-self  
713 recognition system in S-RNase-based self-incompatibility. *Science* **330**,  
714 796-799.
- 715 **Löffler, A., Abel, S., Jost, W., Beintema, J.J., and Glund, K.** (1992).  
716 Phosphate-regulated induction of intracellular ribonucleases in cultured  
717 tomato (*Lycopersicon esculentum*) cells. *Plant Physiol.* **98**, 1472-1478.
- 718 **Lee, H.S., Huang, S., and Kao, T.H.** (1994). S proteins control rejection of  
719 incompatible pollen in *Petunia inflata*. *Nature* **367**, 560-563.
- 720 **Li, J., Zhang, Y., Song, Y., Zhang, H., Fan, J., Li, Q., Zhang, D., and Xue, Y.**  
721 (2017). Electrostatic potentials of the S-locus F-box proteins contribute to the  
722 pollen S specificity in self-incompatibility in *Petunia hybrida*. *Plant J.* **89**,  
723 45-57.
- 724 **Li, S., Tian, Y., Wu, K., Ye, Y., Yu, J., Zhang, J., Liu, Q., Hu, M., Li, H., Tong, Y.,**  
725 **et al.** (2018). Modulating plant growth-metabolism coordination for  
726 sustainable agriculture. *Nature* **560**, 595-600.
- 727 **Li, W., and Chetelat, R.T.** (2014). The role of a pollen-expressed cullin1 protein in  
728 gametophytic self-incompatibility in *Solanum*. *Genetics* **196**, 439-442.
- 729 **Liang, M., Cao, Z., Zhu, A., Liu, Y., Tao, M., Yang, H., Xu, Q., Jr., Wang, S., Liu,**  
730 **J., Li, Y., et al.** (2020). Evolution of self-compatibility by a mutant  
731 S<sub>m</sub>-RNase in *Citrus*. *Nat. Plants* **6**, 131-142.
- 732 **Liu, B., Morse, D., and Cappadocia, M.** (2008). Glycosylation of S-RNases may  
733 influence pollen rejection thresholds in *Solanum chacoense*. *J. Exp. Bot.* **59**,  
734 545-552.
- 735 **Liu, Q., Han, R., Wu, K., Zhang, J., Ye, Y., Wang, S., Chen, J., Pan, Y., Li, Q.,**  
736 **Xu, X., et al.** (2018). G-protein  $\beta\gamma$  subunits determine grain size through  
737 interaction with MADS-domain transcription factors in rice. *Nat. Commun.* **9**,  
738 852.
- 739 **Liu, W., Fan, J., Li, J., Song, Y., Li, Q., Zhang, Y.E., and Xue, Y.** (2014).  
740 SCF<sup>SLF</sup>-mediated cytosolic degradation of S-RNase is required for  
741 cross-pollen compatibility in S-RNase-based self-incompatibility in *Petunia*

- 742           *hybrida*. *Front. Genet.* **5**, 228.
- 743   **Livak, K.J., and Schmittgen, T.D.** (2001). Analysis of relative gene expression data  
744           using real-time quantitative PCR and the  $2^{-(\Delta\Delta C(T))}$  Method.  
745           *Methods* **25**, 402-408.
- 746   **MacIntosh, G.C., Bariola, P.A., Newbigin, E., and Green, P.J.** (2001).  
747           Characterization of Rny1, the *Saccharomyces cerevisiae* member of the T2  
748           RNase family of RNases: unexpected functions for ancient enzymes? *Proc.*  
749           *Natl. Acad. Sci. U.S.A.* **98**, 1018-1023.
- 750   **Meyers, G., Saalmüller, A., and Büttner, M.** (1999). Mutations abrogating the  
751           RNase activity in glycoprotein E<sup>ms</sup> of the pestivirus classical swine fever  
752           virus lead to virus attenuation. *J. Virol.* **73**, 10224-10235.
- 753   **Paez Valencia, J., Goodman, K., and Otegui, M.S.** (2016). Endocytosis and  
754           endosomal trafficking in plants. *Annu. Rev. Plant Biol.* **67**, 309-335.
- 755   **Qiao, H., Wang, F., Zhao, L., Zhou, J., Lai, Z., Zhang, Y., Robbins, T.P., and**  
756           **Xue, Y.** (2004a). The F-box protein AhSLF-S<sub>2</sub> controls the pollen function of  
757           S-RNase-based self-incompatibility. *Plant Cell* **16**, 2307-2322.
- 758   **Qiao, H., Wang, H., Zhao, L., Zhou, J., Huang, J., Zhang, Y., and Xue, Y.**  
759           (2004b). The F-box protein AhSLF-S<sub>2</sub> physically interacts with S-RNases  
760           that may be inhibited by the ubiquitin/26S proteasome pathway of protein  
761           degradation during compatible pollination in *Antirrhinum*. *Plant Cell* **16**,  
762           582-595.
- 763   **Qu, H., Guan, Y., Wang, Y., and Zhang, S.** (2017). PLC-mediated signaling  
764           pathway in pollen tubes regulates the gametophytic self-incompatibility of  
765           *Pyrus* species. *Front. Plant Sci.* **8**, 1164-1164.
- 766   **Ramanauskas, K., and Igić, B.** (2017). The evolutionary history of plant T2/S-type  
767           ribonucleases. *PeerJ.* **5**, e3790.
- 768   **Robbins, T.P., Harbord, R.M., Sonneveld, T., and Clarke, K.** (2000). The  
769           molecular genetics of self-incompatibility in *Petunia hybrida*. *Ann. Bot.* **85**,  
770           105-112.
- 771   **Roiz, L., Smirnoff, P., Bar-Eli, M., Schwartz, B., and Shoseyov, O.** (2006).  
772           ACTIBIND, an actin-binding fungal T2-RNase with antiangiogenic and  
773           anticarcinogenic characteristics. *Cancer* **106**, 2295-2308.
- 774   **Sagar, G.D.V., Gereben, B., Callebaut, I., Mornon, J.P., Zeöld, A., da Silva, W.S.,**  
775           **Luongo, C., Dentice, M., Tente, S.M., Freitas, B.C.G., et al.** (2007).  
776           Ubiquitination-induced conformational change within the deiodinase dimer is  
777           a switch regulating enzyme activity. *Mol. Cell Biol.* **27**, 4774-4783.

- 778 **Samuel, M.A., Chong, Y.T., Haasen, K.E., Aldea-Brydges, M.G., Stone, S.L.,**  
779 **and Goring, D.R.** (2009). Cellular pathways regulating responses to  
780 compatible and self-incompatible pollen in *Brassica* and *Arabidopsis* stigmas  
781 intersect at Exo70A1, a putative component of the exocyst complex. *Plant*  
782 *Cell* **21**, 2655-2671.
- 783 **Sims, T.L., and Ordanic, M.** (2001). Identification of a S-ribonuclease-binding  
784 protein in *Petunia hybrida*. *Plant Mol. Biol.* **47**, 771-783.
- 785 **Takayama, S., and Isogai, A.** (2005). Self-incompatibility in plants. *Annu. Rev.*  
786 *Plant Biol.* **56**, 467-489.
- 787 **Thomas, S.G., Huang, S., Li, S., Staiger, C.J., and Franklin-Tong, V.E.** (2006).  
788 Actin depolymerization is sufficient to induce programmed cell death in  
789 self-incompatible pollen. *J. Cell Biol.* **174**, 221-229.
- 790 **Thompson, D.M., and Parker, R.** (2009). The RNase Rny1p cleaves tRNAs and  
791 promotes cell death during oxidative stress in *Saccharomyces cerevisiae*. *J.*  
792 *Cell Biol.* **185**, 43-50.
- 793 **Thrower, J.S., Hoffman, L., Rechsteiner, M., and Pickart, C.M.** (2000).  
794 Recognition of the polyubiquitin proteolytic signal. *EMBO J.* **19**, 94-102.
- 795 **Udeshi, N.D., Mertins, P., Svinkina, T., and Carr, S.A.** (2013a). Large-scale  
796 identification of ubiquitination sites by mass spectrometry. *Nat. Protoc.* **8**,  
797 1950-1960.
- 798 **Udeshi, N.D., Svinkina, T., Mertins, P., Kuhn, E., Mani, D.R., Qiao, J.W., and**  
799 **Carr, S.A.** (2013b). Refined preparation and use of anti-diglycine remnant  
800 (K- $\epsilon$ -GG) antibody enables routine quantification of 10,000s of  
801 ubiquitination sites in single proteomics experiments. *Mol. Cell. Proteomics*  
802 **12**, 825-831.
- 803 **Wang, X., Herr, R.A., and Hansen, T.H.** (2012). Ubiquitination of substrates by  
804 esterification. *Traffic* **13**, 19-24.
- 805 **Wiederstein, M., and Sippl, M.J.** (2007). ProSA-web: interactive web service for  
806 the recognition of errors in three-dimensional structures of proteins. *Nucleic*  
807 *Acids Res.* **35**, W407-410.
- 808 **Wilkins, K.A., Poulter, N.S., and Franklin-Tong, V.E.** (2014). Taking one for the  
809 team: self-recognition and cell suicide in pollen. *J. Exp. Bot.* **65**, 1331-1342.
- 810 **Willard, L., Ranjan, A., Zhang, H., Monzavi, H., Boyko, R.F., Sykes, B.D., and**  
811 **Wishart, D.S.** (2003). VADAR: a web server for quantitative evaluation of  
812 protein structure quality. *Nucleic Acids Res.* **31**, 3316-3319.

- 813 **Xu, C., Li, M., Wu, J., Guo, H., Li, Q., Zhang, Y.E., Chai, J., Li, T., and Xue, Y.**  
814 (2013). Identification of a canonical SCF<sup>SLF</sup> complex involved in  
815 S-RNase-based self-incompatibility of *Pyrus* (Rosaceae). *Plant Mol. Biol.* **81**,  
816 245-257.
- 817 **Yang, J., Yan, R., Roy, A., Xu, D., Poisson, J., and Zhang, Y.** (2015). The  
818 I-TASSER suite: protein structure and function prediction. *Nat. Methods* **12**,  
819 7-8.
- 820 **Yang, Q., Meng, D., Gu, Z., Li, W., Chen, Q., Li, Y., Yuan, H., Yu, J., Liu, C.,**  
821 **and Li, T.** (2018). Apple S-RNase interacts with an actin-binding protein,  
822 MdMVG, to reduce pollen tube growth by inhibiting its actin-severing  
823 activity at the early stage of self-pollination induction. *Plant J.* **95**, 41-56.
- 824 **Zhang, Y., Vuković, L., Rudack, T., Han, W., and Schulten, K.** (2016).  
825 Recognition of poly-ubiquitins by the proteasome through protein refolding  
826 guided by electrostatic and hydrophobic interactions. *J. Phys. Chem. B.* **120**,  
827 8137-8146.
- 828 **Zhang, Y., Zhao, Z., and Xue, Y.** (2009). Roles of proteolysis in plant  
829 self-incompatibility. *Annu. Rev. Plant Biol.* **60**, 21-42.
- 830 **Zhao, L., Huang, J., Zhao, Z., Li, Q., Sims, T.L., and Xue, Y.** (2010). The  
831 Skp1-like protein SSK1 is required for cross-pollen compatibility in  
832 S-RNase-based self-incompatibility. *Plant J.* **62**, 52-63.
- 833

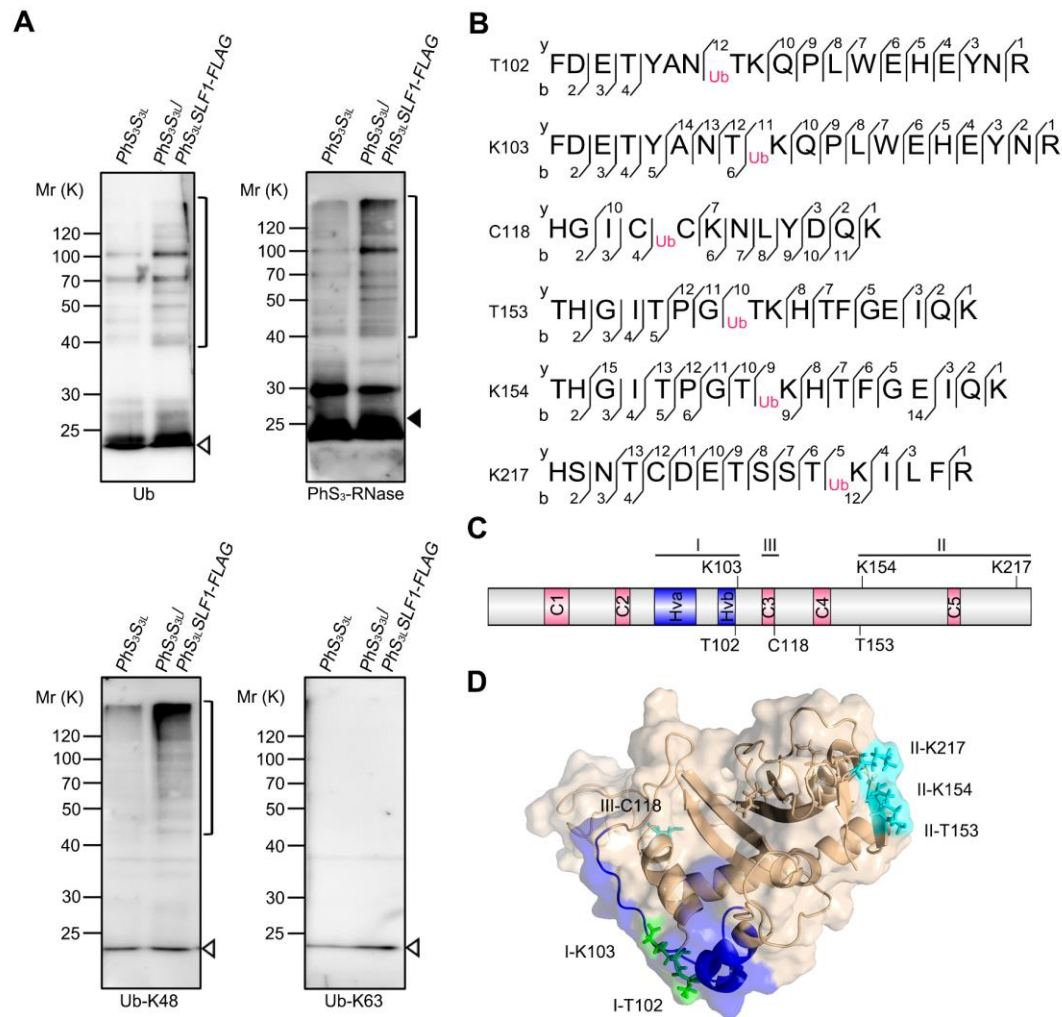

834

835 **Figure 1. Six amino acid residues of PhS<sub>3</sub>-RNase are ubiquitinated by**

836 **K48-linked polyubiquitin chains through SCF<sup>PhS<sub>3L</sub>SLF1</sup>.**

837 **(A)** Immunoblot detection of *in vitro* ubiquitinated products of PhS<sub>3</sub>-RNase by

838 PhS<sub>3L</sub>SLF1. The pollen genotypes and the transgene are indicated on top and

839 *PhS<sub>3</sub>S<sub>3L</sub>* used as a negative control. Brackets indicate polyubiquitinated PhS<sub>3</sub>-RNases.

840 Open and filled arrowheads indicate ubiquitin and unubiquitinated PhS<sub>3</sub>-RNase

841 monomers, respectively. Antibodies used are indicated in the bottom as Ub,

842 PhS<sub>3</sub>-RNase, Ub-K48 and Ub-K63, respectively.

843 **(B)** Ubiquitination sites of PhS<sub>3</sub>-RNase identified by LC-MS/MS. Ub: the amino

844 acid residue on its right within the peptide sequence of PhS<sub>3</sub>-RNase is ubiquitinated.

845 The b- and y-type product ions are indicated.

846 **(C)** The secondary structural features of PhS<sub>3</sub>-RNase with the locations of the six

847 ubiquitination sites. C1-C5, five conservative regions; Hva and Hvb, hypervariable  
848 region a and b. K, C and T: lysine, cysteine and threonine, respectively.  
849 **(D)** Spatial locations of the six ubiquitination sites on the 3D structure of  
850 PhS<sub>3</sub>-RNase. The dark blue region indicates the Hv regions of PhS<sub>3</sub>-RNase, the  
851 green the residues identified by LC-MS/MS in unpollinated, self-pollinated and  
852 cross-pollinated pistils, and the cyan the residues identified specifically in  
853 cross-pollinated pistils. I, II and III: three regions containing the ubiquitination sites  
854 shown in the predicted 3D structure of PhS<sub>3</sub>-RNase.



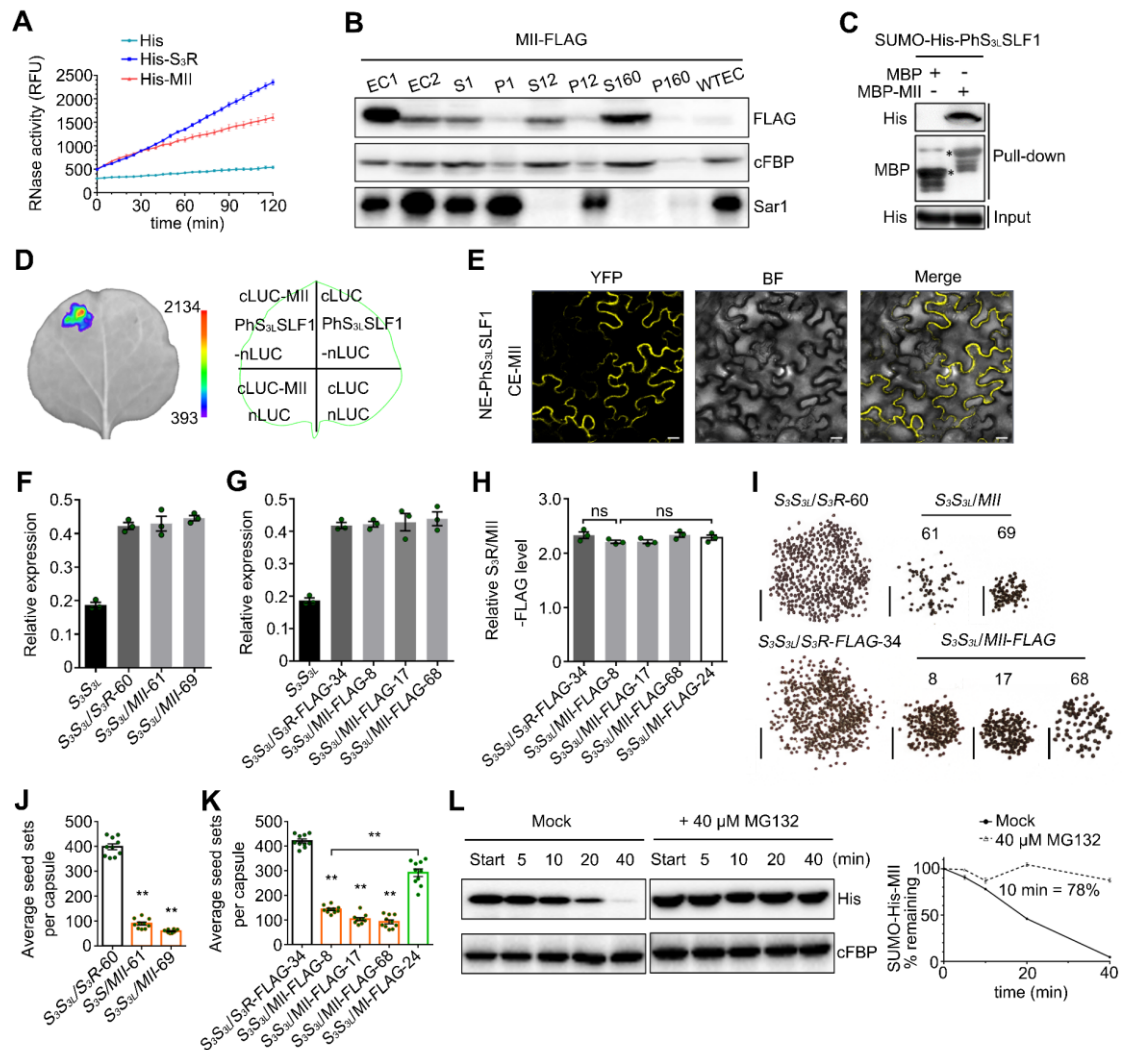

855

856 **Figure 2. PhS<sub>3</sub>-RNase with mutated R II significantly inhibits cross seed sets.**

857 (A) RNase activity detection of His-S<sub>3</sub>R and MII expressed by *pCold-TF* vectors.

858 The relative fluorescence unit (RFU) indicating RNase activity during a time course

859 experiment are shown as means ± s.e.m. (n = 3). II: the ubiquitinated region II of

860 PhS<sub>3</sub>-RNase.

861 (B) Immunoblot detection of MII-FLAG in subcellular fractions of *in vitro*

862 germinated pollen tubes. EC1, EC2 and WTEC indicate entire cell homogenates of

863 the pistils from the transgenic plants containing *MII-FLAG*, the pollen tubes of

864 *PhS<sub>3V</sub>S<sub>3L</sub>* treated with EC1 and the pistils from wild type *PhS<sub>3</sub>S<sub>3L</sub>*. WTEC was a

865 negative control. S1 and P1, S12 and P12, S160 and P160 indicate supernatant and

866 pellet fractions obtained by centrifugation of EC2 at 1,000 g, 12,000 g and 160,000 g,

867 respectively. cFBP and Sar1 are marker antibodies of cytosol and endoplasmic

868 reticulum (ER), respectively.

869 **(C)** Physical interactions between PhS<sub>3L</sub>SLF1 and MII detected by pull-down assay.

870 Input and pull-down: bait protein SUMO-His-PhS<sub>3L</sub>SLF1 and prey proteins detected

871 by immunoblots, respectively. Asterisks indicate bands of target proteins.

872 **(D)** SFLC assay. The numbers on the left side of the color signal bars represent the

873 values of the fluorescent signal. The injection positions of each component on

874 tobacco leaves are indicated in the contour diagram of leaf margin.

875 **(E)** BiFC assay. NE and CE: transiently expressed N-terminal and C-terminal

876 regions of YFP by *pSPYNE* and *pSPYCE* vectors. YFP, BF and Merge represent the

877 YFP fluorescence, white light and their merged field, respectively. Bars: 20  $\mu$ m.

878 **(F) and (G)** Transcripts of transgene and native *PhS<sub>3</sub>-RNase* detected by qRT-PCR.

879 The T<sub>0</sub> transgenic lines are indicated below the horizontal axes. *S<sub>3</sub>S<sub>3L</sub>* is wild type.

880 Data are shown as means  $\pm$  s.e.m. (n = 3).

881 **(H)** Quantitative analysis of S<sub>3</sub>R- and MII-FLAG proteins. The T<sub>0</sub> transgenic lines

882 are indicated below the horizontal axes. Data are shown as means  $\pm$  s.e.m. (n = 3). A

883 student's *t*-test was used to generate the *p* values. ns, *p* > 0.05; \*\*, *p* < 0.01.

884 **(I)** Reduced seed set per capsule from T<sub>0</sub> transgenic lines with mutated R II of

885 PhS<sub>3</sub>-RNase. The transgenic plants containing *S<sub>3</sub>R* or *MII* and *S<sub>3</sub>R-FLAG* or

886 *MII-FLAG* were pollinated with cross pollen of *PhS<sub>V</sub>S<sub>V</sub>*. Numbers below the

887 horizontal lines are T<sub>0</sub> transgenic line numbers. Bars: 5 mm.

888 **(J) and (K)** Statistical analyses of seed sets per capsule from T<sub>0</sub> transgenic plants

889 pollinated with cross pollen of *PhS<sub>V</sub>S<sub>V</sub>*. Data are shown as means  $\pm$  s.e.m. (n  $\geq$  9). A

890 student's *t*-test was used to generate the *p* values. \*\*, *p* < 0.01.

891 **(L)** Cell-free degradation of recombinant SUMO-His-MII. Left, immunoblots of the

892 reaction products incubated with or without MG132 (Mock). Start, time point zero in

893 each degradation assay. cFBP antibody was used to detect non-degraded loading

894 control. Right, quantitative analysis of the degradation rates. Data are shown as

895 means  $\pm$  s.e.m. (n = 3). The remaining amount at 10 min is indicated.

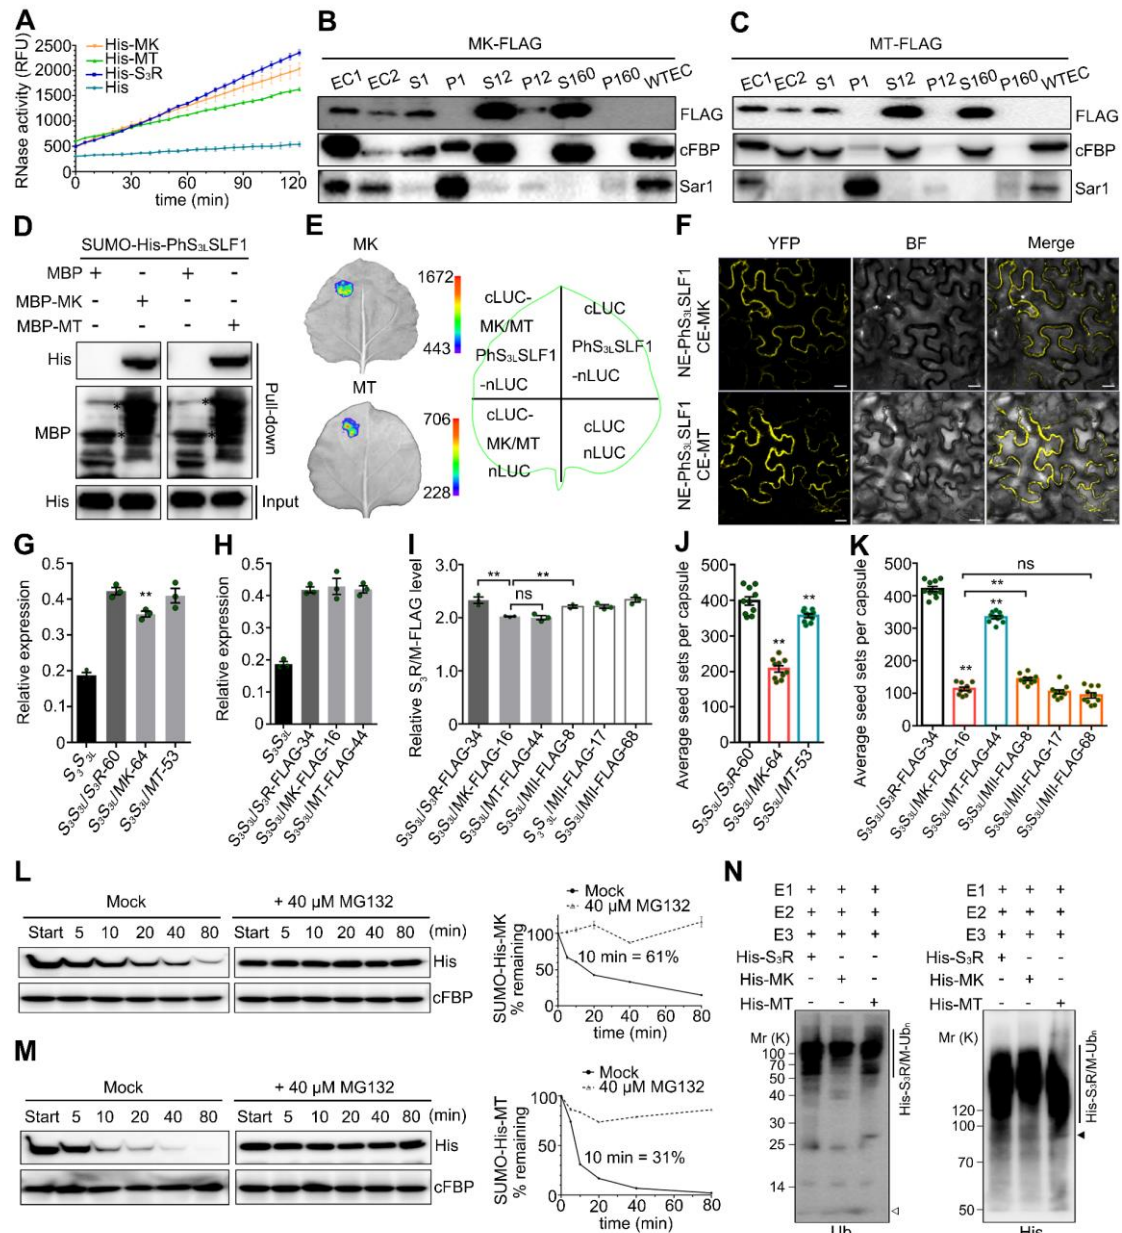

896

897 **Figure 3. K154 and K217 of the R II of PhS<sub>3</sub>-RNase serve as two major**  
 898 **ubiquitination sites for its degradation in cross-pollen tubes.**

899 (A) RNase activity detection of His-MK and MT expressed by *pCold-TF* vectors. K  
 900 and T: lysine and threonine within six ubiquitinated residues of PhS<sub>3</sub>-RNase.

901 (B) and (C) Immunoblot detection of MK- and MT-FLAG in subcellular fractions of  
 902 *in vitro* germinated pollen tubes. EC1 and EC2 indicate entire cell homogenates of  
 903 the pistils from the transgenic plants containing MK- (B) or MT-FLAG (C), and the  
 904 pollen tubes of *PhS<sub>V</sub>S<sub>V</sub>* treated with EC1.

905 (D) Physical interactions between PhS<sub>3</sub>-SLF1 and MK and MT detected by

906 pull-down assays.

907 **(E)** SFLC assays. **(F)** BiFC assays.

908 **(G) and (H)** Transcripts of transgene and native *PhS<sub>3</sub>-RNase* detected by qRT-PCR.

909 Data are shown as means  $\pm$  s.e.m. (n = 3). \*\*,  $p < 0.01$ .

910 **(I)** Quantitative analysis of S<sub>3</sub>R-, MK- and MT-FLAG proteins. Data are shown as

911 means  $\pm$  s.e.m. (n = 3).

912 **(J) and (K)** Statistical analyses of seed sets per capsule from T<sub>0</sub> transgenic plants

913 pollinated with cross pollen of *PhS<sub>V</sub>S<sub>V</sub>*. Data are shown as means  $\pm$  s.e.m. (n = 10).

914 **(L) and (M)** Immunoblots of recombinant SUMO-His-MK and -MT in the cell-free

915 degradation products incubated with or without MG132 (Mock).

916 **(N)** Immunoblots detection of *in vitro* ubiquitination products of His-S<sub>3</sub>R, -MK and

917 -MT by SCF<sup>PhS<sub>3</sub>L<sub>3</sub>SLF1-FLAG</sup> (E3) using anti-Ub and -His antibodies. The vertical lines

918 illustrate the ubiquitinated substrates. Open and filled arrowheads indicate ubiquitin

919 and unubiquitinated substrate monomers, respectively.

920 Annotations of this figure are identical to those of Figure 2.

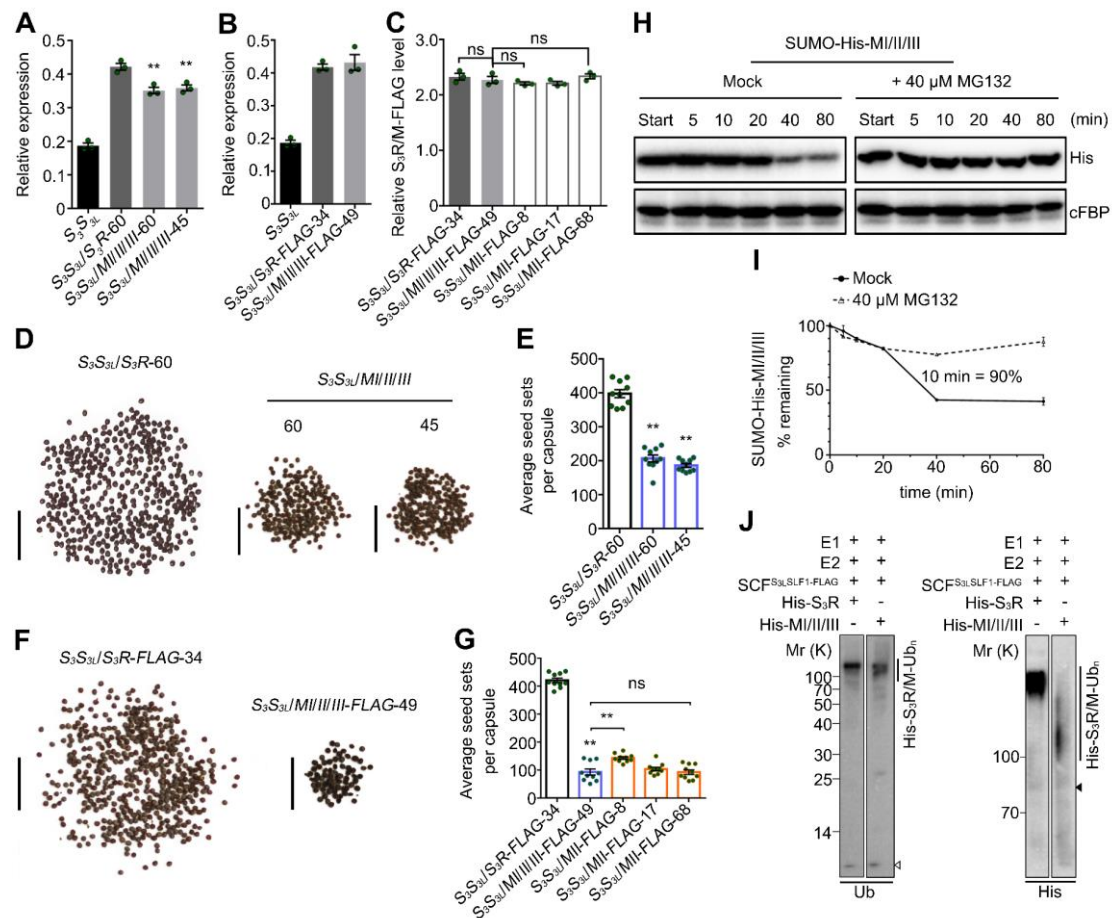

921

922 **Figure 4. PhS<sub>3</sub>-RNase with mutated R I, II and III regions significantly reduces**  
 923 **cross seed sets.**

924 **(A) and (B)** Transcripts of transgene and native *PhS<sub>3</sub>-RNase* detected by qRT-PCR.

925 Data are shown as means ± s.e.m. (n = 3). I, II and III, three ubiquitination regions of  
 926 *PhS<sub>3</sub>-RNase*.

927 **(C)** Quantitative analysis of S<sub>3</sub>R- and MI/II/III-FLAG proteins. Data are shown as  
 928 means ± s.e.m. (n = 3).

929 **(D)** Reduced seed set per capsule from cross-pollinated T<sub>0</sub> transgenic lines

930 containing *MI/II/III*. The transgenic plants containing *MI/II/III* were pollinated with  
 931 cross pollen of *PhS<sub>V</sub>S<sub>V</sub>*. Numbers below the horizontal lines indicate T<sub>0</sub> transgenic  
 932 line numbers.

933 **(E)** Statistical analyses of seed sets per capsule from T<sub>0</sub> transgenic lines described in

934 **D**. Data are shown as means ± s.e.m. (n = 10).

935 **(F)** Reduced seed set per capsule from cross-pollinated T<sub>0</sub> transgenic lines

936 containing *MI/II/III-FLAG*.  
937 **(G)** Statistical analyses of seed sets per capsule from T<sub>0</sub> transgenic lines described in  
938 **F**. Data are shown as means  $\pm$  s.e.m. (n = 10).  
939 **(H)** Immunoblots of recombinant SUMO-His-MI/II/III in the cell-free degradation  
940 products incubated with or without MG132 (Mock).  
941 **(I)** Quantitative analyses of immunoblots from **H** and the degradation rate.  
942 **(J)** Immunoblot detections of *in vitro* ubiquitinated recombinant His-tagged S<sub>3</sub>R and  
943 MI/II/III.  
944 Annotations of this figure are identical to those of Figure 2 and 3.

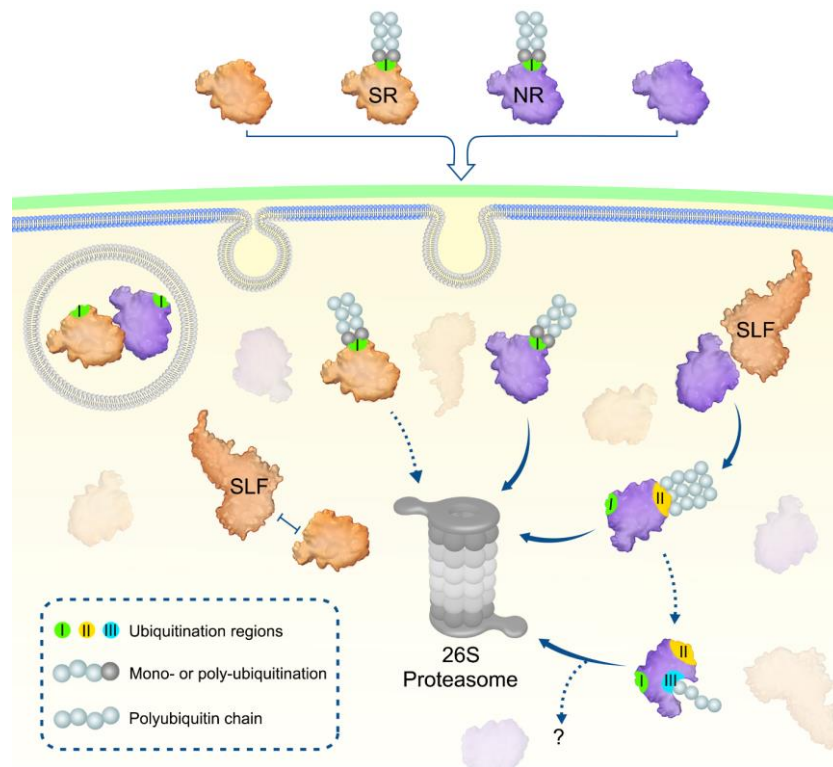

945

946 **Figure 5. Proposed model for a stepwise ubiquitination and degradation**  
947 **mechanism of S-RNases.**

948 SR, NR and their R I ubiquitinated forms can enter the cytoplasm through the pollen  
949 tube membrane. The R I ubiquitinated S-RNases could be degraded by the 26S  
950 proteasome, whereas their unubiquitinated forms are identified by SLFs. SR and its  
951 cognate SLF repel each other and results in an inability of  $SCF^{SLF}$  to ubiquitinate SR.  
952 In contrast, NR is attracted by non-self SLF for R II ubiquitination by  $SCF^{SLF}$  and its  
953 subsequent degradation by the 26S proteasome. Subsequently, internal R III could be  
954 further exposed for ubiquitination, leading to degradation of NR by the 26S  
955 proteasome or other unknown pathway. In addition, S-RNase compartmentalization  
956 could occur in the vacuole and contribute to its sequestration. SR and NR: self and  
957 non-self S-RNases; I, II, and III: three ubiquitination regions in S-RNases.

958

959 **Supplemental Data**

960 **Supplemental Figure 1.** Identification of six ubiquitinated residues of PhS<sub>3</sub>-RNase  
961 by LC-MS/MS analysis of cross-pollinated pistils.

962 **Supplemental Figure 2.** Two ubiquitinated residues of PhS<sub>3</sub>-RNase identified by  
963 LC-MS/MS analysis of self-pollinated and unpollinated pistils.

964 **Supplemental Figure 3.** Locations of six ubiquitinated residues of PhS<sub>3</sub>-RNase in  
965 Solanaceous S-RNases.

966 **Supplemental Figure 4.** PhS<sub>3</sub>-RNase with the mutated R I displays largely unaltered  
967 biochemical and physical properties.

968 **Supplemental Figure 5.** Physical interactions between S<sub>3</sub>R/M and PhS<sub>3</sub>SLF1.

969 **Supplemental Figure 6.** Predicted 3D structures and surface electrostatic potentials  
970 of PhS<sub>3</sub>-RNases with mutated ubiquitinated residues.

971 **Supplemental Figure 7.** S<sub>3</sub>R and S<sub>3</sub>R (M) transgenes identification by PCR analysis.

972 **Supplemental Figure 8.** Identification of *FLAG*-tagged S<sub>3</sub>R and S<sub>3</sub>R (M) transgenes  
973 by PCR analysis.

974 **Supplemental Figure 9.** Detection of *FLAG*-tagged S<sub>3</sub>R and S<sub>3</sub>R (M) transgenes  
975 expression by immunoblots.

976 **Supplemental Figure 10.** PhS<sub>3</sub>-RNase with the mutated R I slightly reduces cross  
977 seed sets.

978 **Supplemental Figure 11.** Decreased ubiquitination amount of MI, II and III mediated  
979 by SCF<sup>PhS<sub>3</sub>L<sub>3</sub>SLF1</sup>.

980 **Supplemental Figure 12.** Reduced seed set per capsule from T<sub>0</sub> transgenic lines with  
981 mutated lysine or threonine within the six ubiquitinated residues of PhS<sub>3</sub>-RNase.

982 **Supplemental Figure 13.** MIII largely maintains the biochemical and physical  
983 properties of PhS<sub>3</sub>-RNase.

984 **Supplemental Figure 14.** PhS<sub>3</sub>-RNase with mutated R III markedly reduces cross  
985 seed sets.

986 **Supplemental Figure 15.** Largely unaltered physicochemical properties of  
987 PhS<sub>3</sub>-RNase with mutated R I, II and III.

988 **Supplemental Table 1.** Seed sets of S<sub>3</sub>S<sub>3</sub>L/S<sub>3</sub>R and S<sub>3</sub>S<sub>3</sub>L/S<sub>3</sub>R (M) T<sub>0</sub> transgenic plants.

989 **Supplemental Table 2.** Seed sets of S<sub>3</sub>S<sub>3</sub>L/S<sub>3</sub>R-*FLAG* and S<sub>3</sub>S<sub>3</sub>L/S<sub>3</sub>R (M)-*FLAG* T<sub>0</sub>  
990 transgenic plants.



991 **Supplemental Table 3.** List of primer sequences.

**A**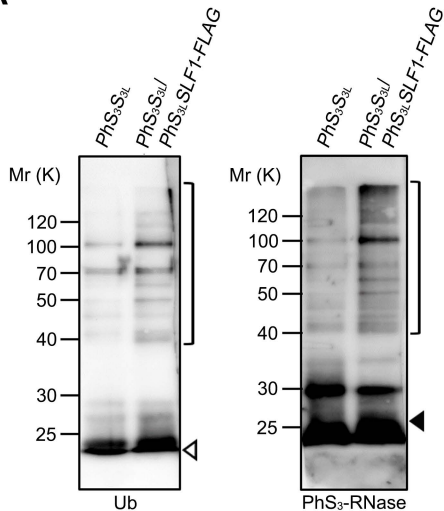**B**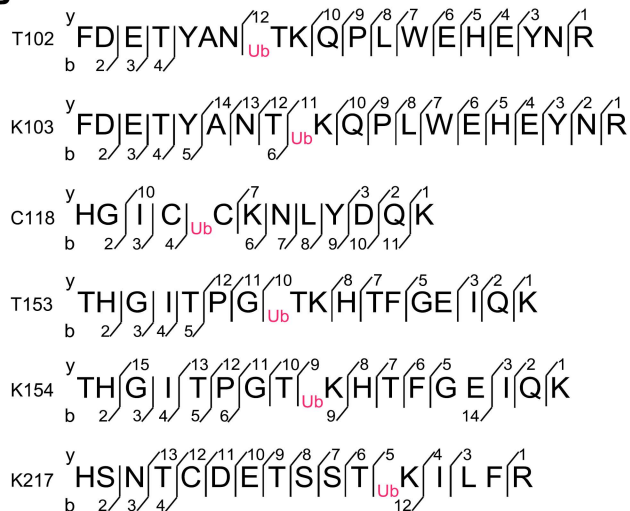**C**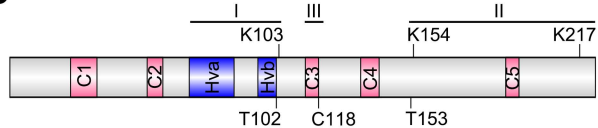**D**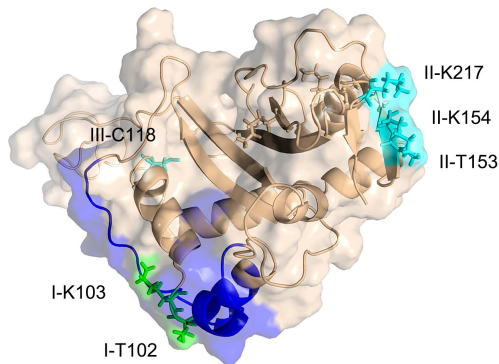

**Figure 1. Six amino acid residues of PhS<sub>3</sub>-RNase are ubiquitinated by K48-linked polyubiquitin chains through SCF<sup>PhS<sub>3L</sub>SLF1</sup>.**

**(A)** Immunoblot detection of *in vitro* ubiquitinated products of PhS<sub>3</sub>-RNase by PhS<sub>3L</sub>SLF1. The pollen genotypes and the transgene are indicated on top and *PhS<sub>3</sub>S<sub>3L</sub>* used as a negative control. Brackets indicate polyubiquitinated PhS<sub>3</sub>-RNases. Open and filled arrowheads indicate ubiquitin and unubiquitinated PhS<sub>3</sub>-RNase monomers, respectively. Antibodies used are indicated in the bottom as Ub, PhS<sub>3</sub>-RNase, Ub-K48 and Ub-K63, respectively.

**(B)** Ubiquitination sites of PhS<sub>3</sub>-RNase identified by LC-MS/MS. Ub: the amino acid residue on its right within the peptide sequence of PhS<sub>3</sub>-RNase is ubiquitinated. The b- and y-type product ions are indicated.

**(C)** The secondary structural features of PhS<sub>3</sub>-RNase with the locations of the six ubiquitination sites. C1-C5, five conservative regions; Hva and Hvb, hypervariable region a and b. K, C and T: lysine, cysteine and threonine, respectively.

**(D)** Spatial locations of the six ubiquitination sites on the 3D structure of PhS<sub>3</sub>-RNase. The dark blue region indicates the Hv regions of PhS<sub>3</sub>-RNase, the green the residues identified by LC-MS/MS in unpollinated, self-pollinated and cross-pollinated pistils, and the cyan the residues identified specifically in cross-pollinated pistils. I, II and III: three regions containing the ubiquitination sites shown in the predicted 3D structure of PhS<sub>3</sub>-RNase.

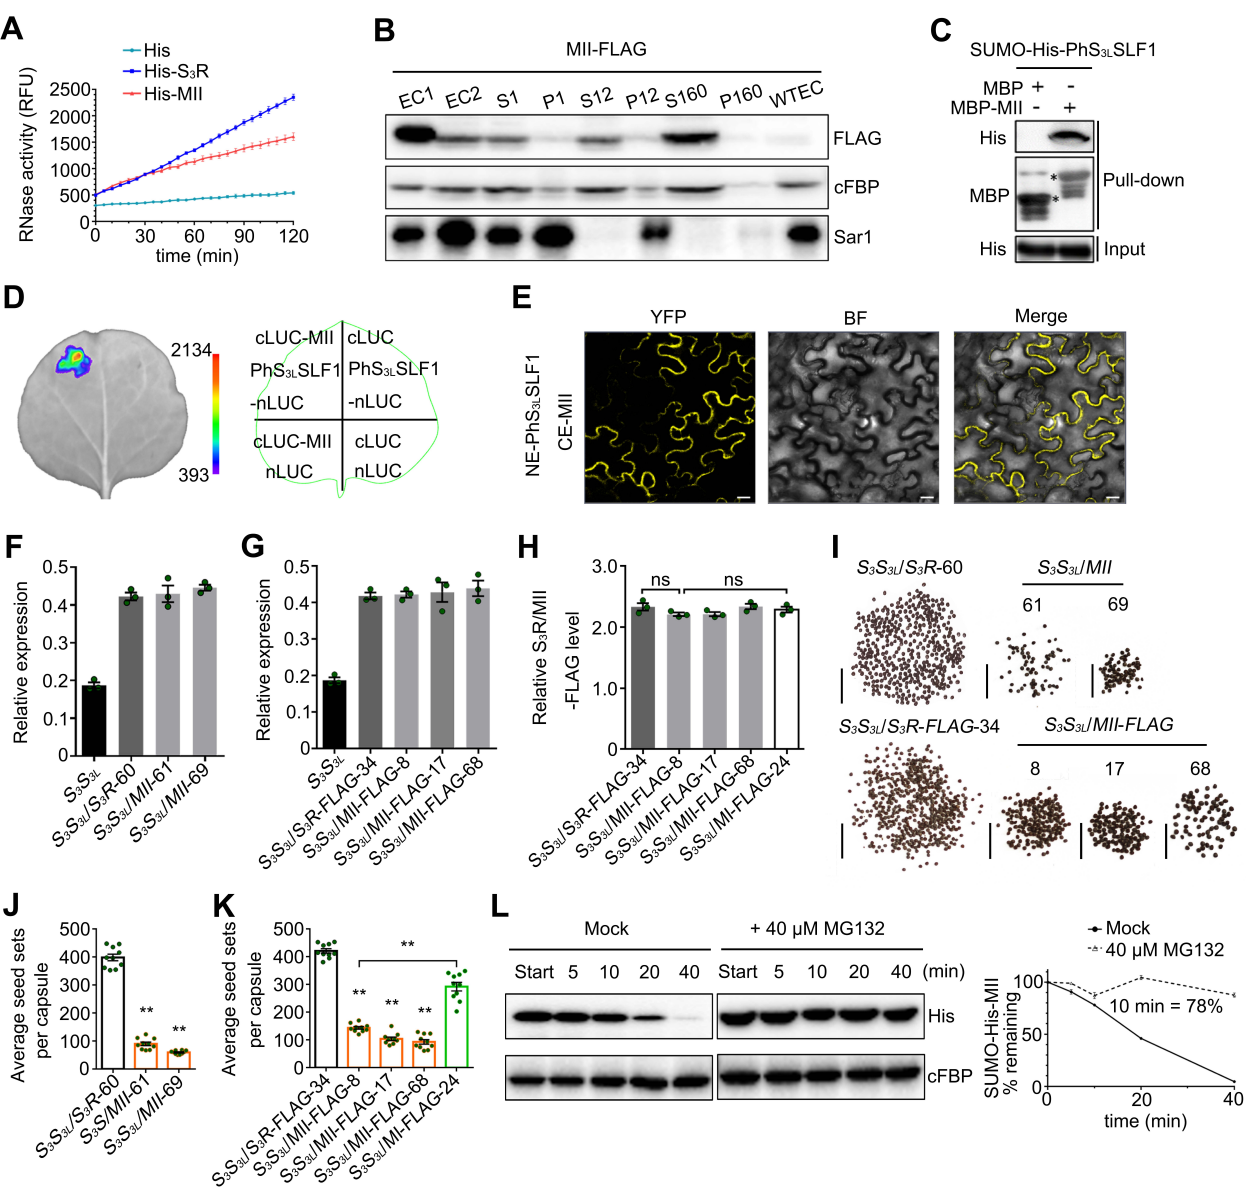

**Figure 2. PhS<sub>3</sub>-RNase with mutated R II significantly inhibits cross seed sets.**

**(A)** RNase activity detection of His-S<sub>3</sub>R and MII expressed by *pCold-TF* vectors. The relative fluorescence unit (RFU) indicating RNase activity during a time course experiment are shown as means  $\pm$  s.e.m. (n = 3). II: the ubiquitinated region II of PhS<sub>3</sub>-RNase.

**(B)** Immunoblot detection of MII-FLAG in subcellular fractions of *in vitro* germinated pollen tubes. EC1, EC2 and WTEC indicate entire cell homogenates of the pistils from the transgenic plants containing *MII-FLAG*, the pollen tubes of *PhS<sub>V</sub>S<sub>V</sub>* treated with EC1 and the pistils from wild type *PhS<sub>3</sub>S<sub>3L</sub>*. WTEC was a negative control. S1 and P1, S12 and P12, S160 and P160 indicate supernatant and pellet fractions obtained by centrifugation of EC2 at 1,000 g, 12,000 g and 160,000 g, respectively. cFBP and Sar1 are marker antibodies of cytosol and endoplasmic reticulum (ER), respectively.

**(C)** Physical interactions between PhS<sub>3L</sub>SLF1 and MII detected by pull-down assay. Input and pull-down: bait protein SUMO-His-PhS<sub>3L</sub>SLF1 and prey proteins detected by immunoblots, respectively. Asterisks indicate bands of target proteins.

**(D)** SFLC assay. The numbers on the left side of the color signal bars represent the values of the fluorescent signal. The injection positions of each component on tobacco leaves are indicated in the contour diagram of leaf margin.

**(E)** BiFC assay. NE and CE: transiently expressed N-terminal and C-terminal regions of YFP by *pSPYNE* and *pSPYCE* vectors. YFP, BF and Merge represent the YFP fluorescence, white light and their merged field, respectively. Bars: 20  $\mu$ m.

**(F) and (G)** Transcripts of transgene and native *PhS<sub>3</sub>-RNase* detected by qRT-PCR. The T<sub>0</sub> transgenic lines are indicated below the horizontal axes. *S<sub>3</sub>S<sub>3L</sub>* is wild type. Data are shown as means  $\pm$  s.e.m. (n = 3).

**(H)** Quantitative analysis of S<sub>3</sub>R- and MII-FLAG proteins. The T<sub>0</sub> transgenic lines are indicated below the horizontal axes. Data are shown as means  $\pm$  s.e.m. (n = 3). A student's *t*-test was used to generate the *p* values. ns, *p* > 0.05; \*\*, *p* < 0.01.

**(I)** Reduced seed set per capsule from T<sub>0</sub> transgenic lines with mutated R II of PhS<sub>3</sub>-RNase. The transgenic plants containing *S<sub>3</sub>R* or *MII* and *S<sub>3</sub>R-FLAG* or *MII-FLAG*

were pollinated with cross pollen of *PhS<sub>V</sub>S<sub>V</sub>*. Numbers below the horizontal lines are T<sub>0</sub> transgenic line numbers. Bars: 5 mm.

**(J) and (K)** Statistical analyses of seed sets per capsule from T<sub>0</sub> transgenic plants pollinated with cross pollen of *PhS<sub>V</sub>S<sub>V</sub>*. Data are shown as means ± s.e.m. (n ≥ 9). A student's *t*-test was used to generate the *p* values. \*\*, *p* < 0.01.

**(L)** Cell-free degradation of recombinant SUMO-His-MII. Left, immunoblots of the reaction products incubated with or without MG132 (Mock). Start, time point zero in each degradation assay. cFBP antibody was used to detect non-degraded loading control. Right, quantitative analysis of the degradation rates. Data are shown as means ± s.e.m. (n = 3). The remaining amount at 10 min is indicated.

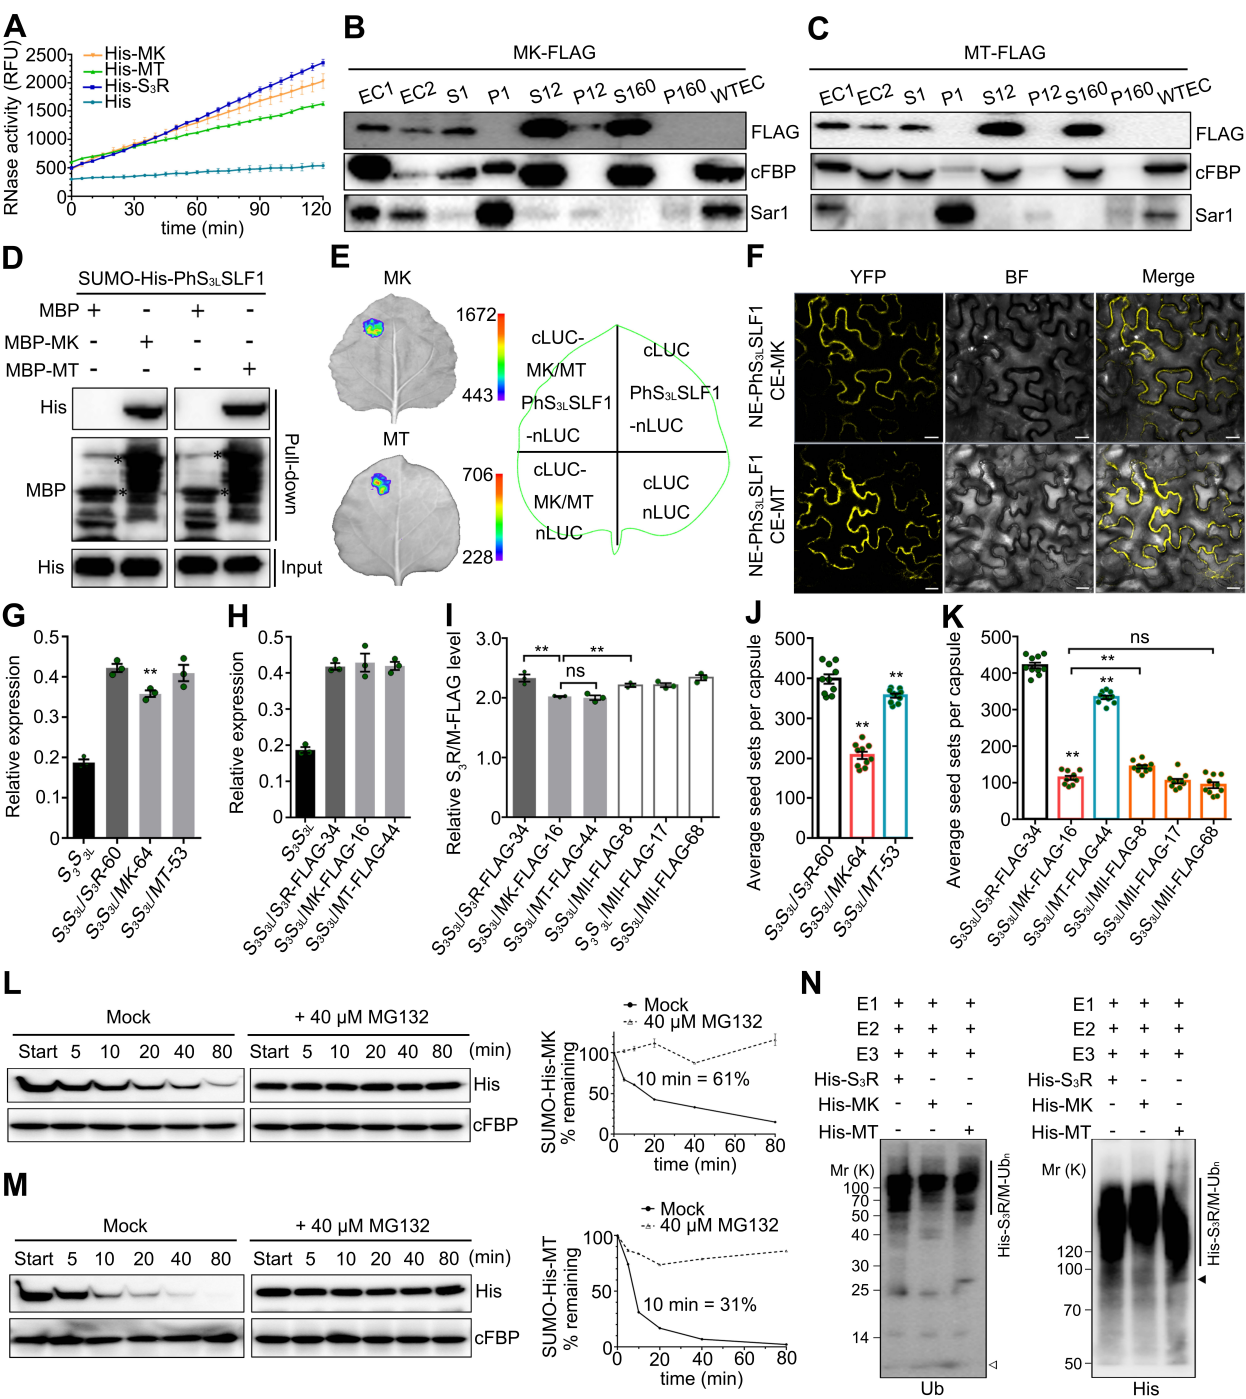

**Figure 3. K154 and K217 of the R II of PhS<sub>3</sub>-RNase serve as two major ubiquitination sites for its degradation in cross-pollen tubes.**

**(A)** RNase activity detection of His-MK and MT expressed by *pCold-TF* vectors. K and T: lysine and threonine within six ubiquitinated residues of PhS<sub>3</sub>-RNase.

**(B) and (C)** Immunoblot detection of MK- and MT-FLAG in subcellular fractions of *in vitro* germinated pollen tubes. EC1 and EC2 indicate entire cell homogenates of the pistils from the transgenic plants containing *MK-* **(B)** or *MT-FLAG* **(C)**, and the pollen tubes of *PhS<sub>V</sub>S<sub>V</sub>* treated with EC1.

**(D)** Physical interactions between PhS<sub>3L</sub>SLF1 and MK and MT detected by pull-down assays.

**(E)** SFLC assays. **(F)** BiFC assays.

**(G) and (H)** Transcripts of transgene and native *PhS<sub>3</sub>-RNase* detected by qRT-PCR.

Data are shown as means  $\pm$  s.e.m. (n = 3). \*\*,  $p < 0.01$ .

**(I)** Quantitative analysis of S<sub>3</sub>R-, MK- and MT-FLAG proteins. Data are shown as means  $\pm$  s.e.m. (n = 3).

**(J) and (K)** Statistical analyses of seed sets per capsule from T<sub>0</sub> transgenic plants pollinated with cross pollen of *PhS<sub>V</sub>S<sub>V</sub>*. Data are shown as means  $\pm$  s.e.m. (n = 10).

**(L) and (M)** Immunoblots of recombinant SUMO-His-MK and -MT in the cell-free degradation products incubated with or without MG132 (Mock).

**(N)** Immunoblots detection of *in vitro* ubiquitination products of His-S<sub>3</sub>R, -MK and -MT by SCF<sup>PhS<sub>3L</sub>SLF1-FLAG</sup> (E3) using anti-Ub and -His antibodies. The vertical lines illustrate the ubiquitinated substrates. Open and filled arrowheads indicate ubiquitin and unubiquitinated substrate monomers, respectively.

Annotations of this figure are identical to those of Figure 2.



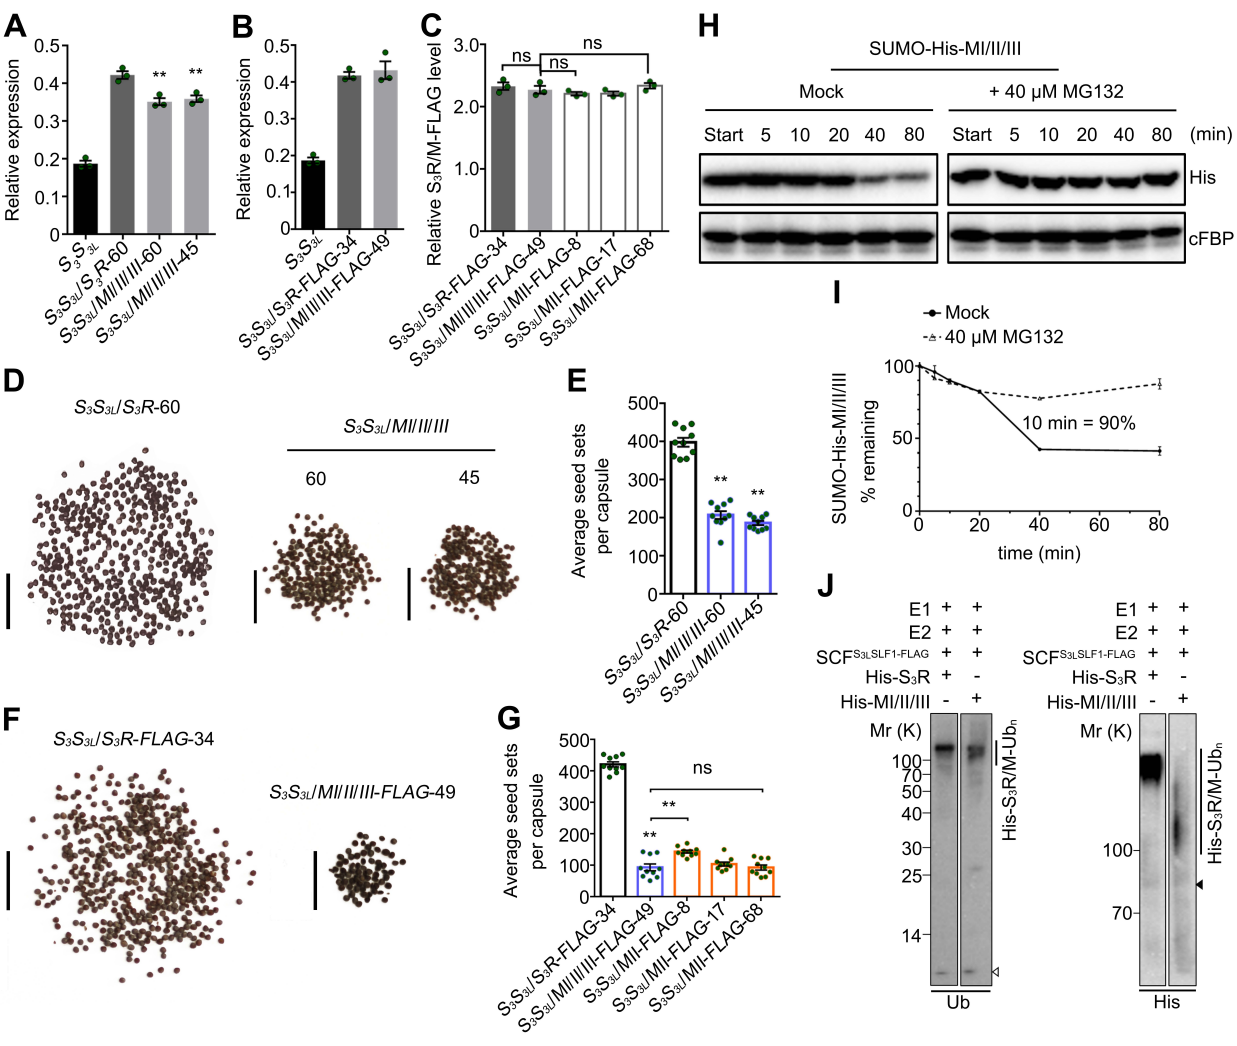

**Figure 4. PhS<sub>3</sub>-RNase with mutated R I, II and III regions significantly reduces cross seed sets.**

- (A) and (B)** Transcripts of transgene and native *PhS<sub>3</sub>-RNase* detected by qRT-PCR. Data are shown as means  $\pm$  s.e.m. (n = 3). I, II and III, three ubiquitination regions of PhS<sub>3</sub>-RNase.
- (C)** Quantitative analysis of S<sub>3</sub>R- and MI/II/III-FLAG proteins. Data are shown as means  $\pm$  s.e.m. (n = 3).
- (D)** Reduced seed set per capsule from cross-pollinated T<sub>0</sub> transgenic lines containing *MI/II/III*. The transgenic plants containing *MI/II/III* were pollinated with cross pollen of *PhS<sub>v</sub>S<sub>v</sub>*. Numbers below the horizontal lines indicate T<sub>0</sub> transgenic line numbers.
- (E)** Statistical analyses of seed sets per capsule from T<sub>0</sub> transgenic lines described in **D**. Data are shown as means  $\pm$  s.e.m. (n = 10).
- (F)** Reduced seed set per capsule from cross-pollinated T<sub>0</sub> transgenic lines containing *MI/II/III-FLAG*.
- (G)** Statistical analyses of seed sets per capsule from T<sub>0</sub> transgenic lines described in **F**. Data are shown as means  $\pm$  s.e.m. (n = 10).
- (H)** Immunoblots of recombinant SUMO-His-MI/II/III in the cell-free degradation products incubated with or without MG132 (Mock).
- (I)** Quantitative analyses of immunoblots from **H** and the degradation rate.
- (J)** Immunoblot detections of *in vitro* ubiquitinated recombinant His-tagged S<sub>3</sub>R and MI/II/III.

Annotations of this figure are identical to those of Figure 2 and 3.

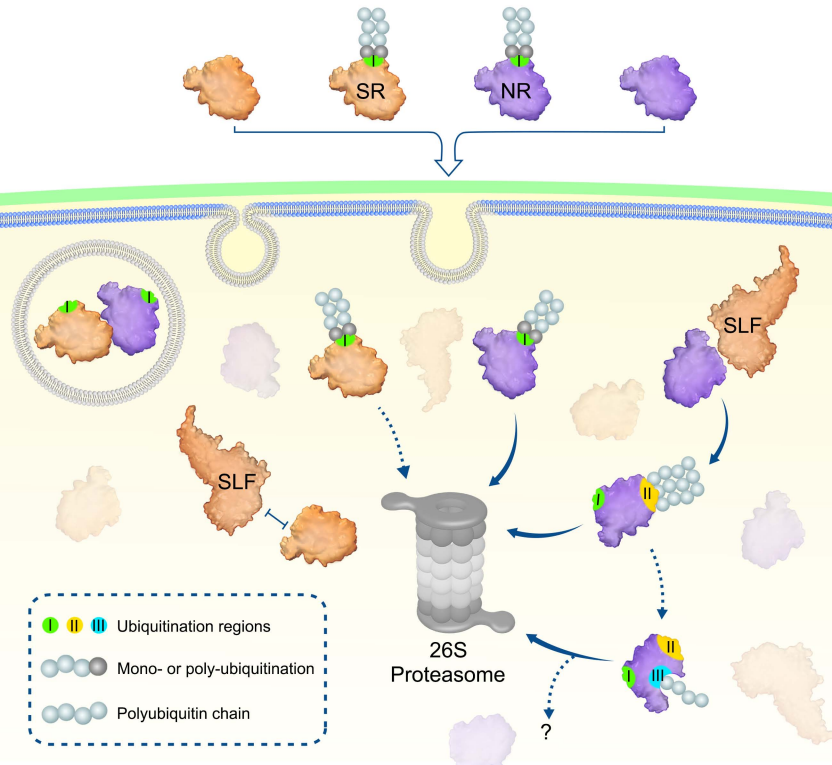

**Figure 5. Proposed model for a stepwise ubiquitination and degradation mechanism of S-RNases.**

SR, NR and their R I ubiquitinated forms can enter the cytoplasm through the pollen tube membrane. The R I ubiquitinated S-RNases could be degraded by the 26S proteasome, whereas their unubiquitinated forms are identified by SLFs. SR and its cognate SLF repel each other and results in an inability of SCF<sup>SLF</sup> to ubiquitinate SR. In contrast, NR is attracted by non-self SLF for R II ubiquitination by SCF<sup>SLF</sup> and its subsequent degradation by the 26S proteasome. Subsequently, internal R III could be further exposed for ubiquitination, leading to degradation of NR by the 26S proteasome or other unknown pathway. In addition, S-RNase compartmentalization could occur in the vacuole and contribute to its sequestration. SR and NR: self and non-self S-RNases; I, II, and III: three ubiquitination regions in S-RNases.

## Parsed Citations

**Anelli, T., and Sitia, R. (2008).** Protein quality control in the early secretory pathway. *EMBO J.* 27, 315-327.

Google Scholar: [Author Only](#) [Title Only](#) [Author and Title](#)

**Baker, N.A., Sept, D., Joseph, S., Holst, M.J., and McCammon, J.A. (2001).** Electrostatics of nanosystems: application to microtubules and the ribosome. *Proc. Natl. Acad. Sci. U.S.A.* 98, 10037-10041.

Google Scholar: [Author Only](#) [Title Only](#) [Author and Title](#)

**Bariola, P.A., Howard, C.J., Taylor, C.B., Verburg, M.T., Jaglan, V.D., and Green, P.J. (1994).** The Arabidopsis ribonuclease gene RNS1 is tightly controlled in response to phosphate limitation. *Plant J.* 6, 673-685.

Google Scholar: [Author Only](#) [Title Only](#) [Author and Title](#)

**Chen, J., Wang, P., de Graaf, B.H.J., Zhang, H., Jiao, H., Tang, C., Zhang, S., and Wu, J. (2018).** Phosphatidic acid counteracts S-RNase signaling in pollen by stabilizing the actin cytoskeleton. *Plant Cell* 30, 1023-1039.

Google Scholar: [Author Only](#) [Title Only](#) [Author and Title](#)

**De Nettancourt, D. (2001).** Incompatibility and incongruity in wild and cultivated plants. Berlin: Springer-Verlag 10.1007/978-3-662-04502-2.

Google Scholar: [Author Only](#) [Title Only](#) [Author and Title](#)

**Entani, T., Kubo, K.I., Isogai, S., Fukao, Y., Shirakawa, M., Isogai, A., and Takayama, S. (2014).** Ubiquitin-proteasome-mediated degradation of S-RNase in a solanaceous cross-compatibility reaction. *Plant J.* 78, 1014-1021.

Google Scholar: [Author Only](#) [Title Only](#) [Author and Title](#)

**Fujii, S., Kubo, K.I., and Takayama, S. (2016).** Non-self- and self-recognition models in plant self-incompatibility. *Nat. Plants* 2, 16130.

Google Scholar: [Author Only](#) [Title Only](#) [Author and Title](#)

**Goldraij, A., Kondo, K., Lee, C.B., Hancock, C.N., Sivaguru, M., Vazquez-Santana, S., Kim, S., Phillips, T.E., Cruz-Garcia, F., and McClure, B. (2006).** Compartmentalization of S-RNase and HT-B degradation in self-incompatible Nicotiana. *Nature* 439, 805-810.

Google Scholar: [Author Only](#) [Title Only](#) [Author and Title](#)

**Gray, J.E., McClure, B.A., Bonig, I., Anderson, M.A., and Clarke, A.E. (1991).** Action of the style product of the self-incompatibility gene of *Nicotiana glauca* (S-RNase) on in vitro-grown pollen tubes. *Plant Cell* 3, 271-283.

Google Scholar: [Author Only](#) [Title Only](#) [Author and Title](#)

**Henneke, M., Diekmann, S., Ohlenbusch, A., Kaiser, J., Engelbrecht, V., Kohlschütter, A., Krätzner, R., Madruga-Garrido, M., Mayer, M., Opitz, L., et al. (2009).** RNASET2-deficient cystic leukoencephalopathy resembles congenital cytomegalovirus brain infection. *Nat. Genet.* 41, 773-775.

Google Scholar: [Author Only](#) [Title Only](#) [Author and Title](#)

**Hua, Z., and Kao, T.H. (2008).** Identification of major lysine residues of S3-RNase of *Petunia inflata* involved in ubiquitin-26S proteasome-mediated degradation in vitro. *Plant J.* 54, 1094-1104.

Google Scholar: [Author Only](#) [Title Only](#) [Author and Title](#)

**Huang, J., Zhao, L., Yang, Q., and Xue, Y. (2006).** AhSSK1, a novel SKP1-like protein that interacts with the S-locus F-box protein SLF. *Plant J.* 46, 780-793.

Google Scholar: [Author Only](#) [Title Only](#) [Author and Title](#)

**Kubo, K.I., Entani, T., Takara, A., Wang, N., Fields, A.M., Hua, Z., Toyoda, M., Kawashima, S.I., Ando, T., Isogai, A., et al. (2010).** Collaborative non-self recognition system in S-RNase-based self-incompatibility. *Science* 330, 796-799.

Google Scholar: [Author Only](#) [Title Only](#) [Author and Title](#)

**Löffler, A., Abel, S., Jost, W., Beintema, J.J., and Glund, K. (1992).** Phosphate-regulated induction of intracellular ribonucleases in cultured tomato (*Lycopersicon esculentum*) cells. *Plant Physiol.* 98, 1472-1478.

Google Scholar: [Author Only](#) [Title Only](#) [Author and Title](#)

**Lee, H.S., Huang, S., and Kao, T.H. (1994).** S proteins control rejection of incompatible pollen in *Petunia inflata*. *Nature* 367, 560-563.

Google Scholar: [Author Only](#) [Title Only](#) [Author and Title](#)

**Li, J., Zhang, Y., Song, Y., Zhang, H., Fan, J., Li, Q., Zhang, D., and Xue, Y. (2017).** Electrostatic potentials of the S-locus F-box proteins contribute to the pollen S specificity in self-incompatibility in *Petunia hybrida*. *Plant J.* 89, 45-57.

Google Scholar: [Author Only](#) [Title Only](#) [Author and Title](#)

**Li, S., Tian, Y., Wu, K., Ye, Y., Yu, J., Zhang, J., Liu, Q., Hu, M., Li, H., Tong, Y., et al. (2018).** Modulating plant growth-metabolism coordination for sustainable agriculture. *Nature* 560, 595-600.

Google Scholar: [Author Only](#) [Title Only](#) [Author and Title](#)

**Li, W., and Chetelat, R.T. (2014).** The role of a pollen-expressed cullin1 protein in gametophytic self-incompatibility in *Solanum*. *Genetics* 196, 439-442.

Google Scholar: [Author Only](#) [Title Only](#) [Author and Title](#)

**Liang, M., Cao, Z., Zhu, A., Liu, Y., Tao, M., Yang, H., Xu, Q., Jr., Wang, S., Liu, J., Li, Y., et al. (2020).** Evolution of self-compatibility by a

**mutant Sm-RNase in Citrus. Nat. Plants 6, 131-142.**

Google Scholar: [Author Only](#) [Title Only](#) [Author and Title](#)

**Liu, B., Morse, D., and Cappadocia, M. (2008). Glycosylation of S-RNases may influence pollen rejection thresholds in *Solanum chacoense*. J. Exp. Bot. 59, 545-552.**

Google Scholar: [Author Only](#) [Title Only](#) [Author and Title](#)

**Liu, Q., Han, R., Wu, K., Zhang, J., Ye, Y., Wang, S., Chen, J., Pan, Y., Li, Q., Xu, X., et al. (2018). G-protein  $\beta$  subunits determine grain size through interaction with MADS-domain transcription factors in rice. Nat. Commun. 9, 852.**

Google Scholar: [Author Only](#) [Title Only](#) [Author and Title](#)

**Liu, W., Fan, J., Li, J., Song, Y., Li, Q., Zhang, Y.E., and Xue, Y. (2014). SCFSLF-mediated cytosolic degradation of S-RNase is required for cross-pollen compatibility in S-RNase-based self-incompatibility in *Petunia hybrida*. Front. Genet. 5, 228.**

Google Scholar: [Author Only](#) [Title Only](#) [Author and Title](#)

**Livak, K.J., and Schmittgen, T.D. (2001). Analysis of relative gene expression data using real-time quantitative PCR and the 2<sup>(-Delta Delta C(T))</sup> Method. Methods 25, 402-408.**

Google Scholar: [Author Only](#) [Title Only](#) [Author and Title](#)

**MacIntosh, G.C., Bariola, P.A., Newbigin, E., and Green, P.J. (2001). Characterization of Rny1, the *Saccharomyces cerevisiae* member of the T2 RNase family of RNases: unexpected functions for ancient enzymes? Proc. Natl. Acad. Sci. U.S.A 98, 1018-1023.**

Google Scholar: [Author Only](#) [Title Only](#) [Author and Title](#)

**Meyers, G., Saalmüller, A., and Büttner, M. (1999). Mutations abrogating the RNase activity in glycoprotein Erns of the pestivirus classical swine fever virus lead to virus attenuation. J. Virol. 73, 10224-10235.**

Google Scholar: [Author Only](#) [Title Only](#) [Author and Title](#)

**Paez Valencia, J., Goodman, K., and Otegui, M.S. (2016). Endocytosis and endosomal trafficking in plants. Annu. Rev. Plant Biol. 67, 309-335.**

Google Scholar: [Author Only](#) [Title Only](#) [Author and Title](#)

**Qiao, H., Wang, F., Zhao, L., Zhou, J., Lai, Z., Zhang, Y., Robbins, T.P., and Xue, Y. (2004a). The F-box protein AhSLF-S2 controls the pollen function of S-RNase-based self-incompatibility. Plant Cell 16, 2307-2322.**

Google Scholar: [Author Only](#) [Title Only](#) [Author and Title](#)

**Qiao, H., Wang, H., Zhao, L., Zhou, J., Huang, J., Zhang, Y., and Xue, Y. (2004b). The F-box protein AhSLF-S2 physically interacts with S-RNases that may be inhibited by the ubiquitin/26S proteasome pathway of protein degradation during compatible pollination in *Antirrhinum*. Plant Cell 16, 582-595.**

Google Scholar: [Author Only](#) [Title Only](#) [Author and Title](#)

**Qu, H., Guan, Y., Wang, Y., and Zhang, S. (2017). PLC-mediated signaling pathway in pollen tubes regulates the gametophytic self-incompatibility of *Pyrus* species. Front. Plant Sci. 8, 1164-1164.**

Google Scholar: [Author Only](#) [Title Only](#) [Author and Title](#)

**Ramanauskas, K., and Igić, B. (2017). The evolutionary history of plant T2/S-type ribonucleases. PeerJ. 5, e3790.**

Google Scholar: [Author Only](#) [Title Only](#) [Author and Title](#)

**Robbins, T.P., Harbord, R.M., Sonneveld, T., and Clarke, K. (2000). The molecular genetics of self-incompatibility in *Petunia hybrida*. Ann. Bot. 85, 105-112.**

Google Scholar: [Author Only](#) [Title Only](#) [Author and Title](#)

**Roiz, L., Smirnov, P., Bar-Eli, M., Schwartz, B., and Shoseyov, O. (2006). ACTIBIND, an actin-binding fungal T2-RNase with antiangiogenic and anticarcinogenic characteristics. Cancer 106, 2295-2308.**

Google Scholar: [Author Only](#) [Title Only](#) [Author and Title](#)

**Sagar, G.D.V., Gereben, B., Callebaut, I., Mornon, J.P., Zeöld, A., da Silva, W.S., Luongo, C., Dentice, M., Tente, S.M., Freitas, B.C.G., et al. (2007). Ubiquitination-induced conformational change within the deiodinase dimer is a switch regulating enzyme activity. Mol. Cell Biol. 27, 4774-4783.**

Google Scholar: [Author Only](#) [Title Only](#) [Author and Title](#)

**Samuel, M.A., Chong, Y.T., Haasen, K.E., Aldea-Brydges, M.G., Stone, S.L., and Goring, D.R. (2009). Cellular pathways regulating responses to compatible and self-incompatible pollen in Brassica and Arabidopsis stigmas intersect at Exo70A1, a putative component of the exocyst complex. Plant Cell 21, 2655-2671.**

Google Scholar: [Author Only](#) [Title Only](#) [Author and Title](#)

**Sims, T.L., and Ordanic, M. (2001). Identification of a S-ribonuclease-binding protein in *Petunia hybrida*. Plant Mol. Biol. 47, 771-783.**

Google Scholar: [Author Only](#) [Title Only](#) [Author and Title](#)

**Takayama, S., and Isogai, A. (2005). Self-incompatibility in plants. Annu. Rev. Plant Biol. 56, 467-489.**

Google Scholar: [Author Only](#) [Title Only](#) [Author and Title](#)

**Thomas, S.G., Huang, S., Li, S., Staiger, C.J., and Franklin-Tong, V.E. (2006). Actin depolymerization is sufficient to induce programmed cell death in self-incompatible pollen. J. Cell Biol. 174, 221-229.**

Google Scholar: [Author Only](#) [Title Only](#) [Author and Title](#)

- Thompson, D.M., and Parker, R. (2009). The RNase Rny1p cleaves tRNAs and promotes cell death during oxidative stress in *Saccharomyces cerevisiae*. *J. Cell Biol.* 185, 43-50.  
Google Scholar: [Author Only](#) [Title Only](#) [Author and Title](#)
- Thrower, J.S., Hoffman, L., Rechsteiner, M., and Pickart, C.M. (2000). Recognition of the polyubiquitin proteolytic signal. *EMBO J.* 19, 94-102.  
Google Scholar: [Author Only](#) [Title Only](#) [Author and Title](#)
- Udeshi, N.D., Mertins, P., Svinkina, T., and Carr, S.A. (2013a). Large-scale identification of ubiquitination sites by mass spectrometry. *Nat. Protoc.* 8, 1950-1960.  
Google Scholar: [Author Only](#) [Title Only](#) [Author and Title](#)
- Udeshi, N.D., Svinkina, T., Mertins, P., Kuhn, E., Mani, D.R., Qiao, J.W., and Carr, S.A. (2013b). Refined preparation and use of anti-diglycine remnant (K-ε-GG) antibody enables routine quantification of 10,000s of ubiquitination sites in single proteomics experiments. *Mol. Cell. Proteomics* 12, 825-831.  
Google Scholar: [Author Only](#) [Title Only](#) [Author and Title](#)
- Wang, X., Herr, R.A., and Hansen, T.H. (2012). Ubiquitination of substrates by esterification. *Traffic* 13, 19-24.  
Google Scholar: [Author Only](#) [Title Only](#) [Author and Title](#)
- Wiederstein, M., and Sippl, M.J. (2007). ProSA-web: interactive web service for the recognition of errors in three-dimensional structures of proteins. *Nucleic Acids Res.* 35, W407-410.  
Google Scholar: [Author Only](#) [Title Only](#) [Author and Title](#)
- Wilkins, K.A., Poulter, N.S., and Franklin-Tong, V.E. (2014). Taking one for the team: self-recognition and cell suicide in pollen. *J. Exp. Bot.* 65, 1331-1342.  
Google Scholar: [Author Only](#) [Title Only](#) [Author and Title](#)
- Willard, L., Ranjan, A., Zhang, H., Monzavi, H., Boyko, R.F., Sykes, B.D., and Wishart, D.S. (2003). VADAR: a web server for quantitative evaluation of protein structure quality. *Nucleic Acids Res.* 31, 3316-3319.  
Google Scholar: [Author Only](#) [Title Only](#) [Author and Title](#)
- Xu, C., Li, M., Wu, J., Guo, H., Li, Q., Zhang, Y.E., Chai, J., Li, T., and Xue, Y. (2013). Identification of a canonical SCFSLF complex involved in S-RNase-based self-incompatibility of *Pyrus* (Rosaceae). *Plant Mol. Biol.* 81, 245-257.  
Google Scholar: [Author Only](#) [Title Only](#) [Author and Title](#)
- Yang, J., Yan, R., Roy, A., Xu, D., Poisson, J., and Zhang, Y. (2015). The I-TASSER suite: protein structure and function prediction. *Nat. Methods* 12, 7-8.  
Google Scholar: [Author Only](#) [Title Only](#) [Author and Title](#)
- Yang, Q., Meng, D., Gu, Z., Li, W., Chen, Q., Li, Y., Yuan, H., Yu, J., Liu, C., and Li, T. (2018). Apple S-RNase interacts with an actin-binding protein, MdMVG, to reduce pollen tube growth by inhibiting its actin-severing activity at the early stage of self-pollination induction. *Plant J.* 95, 41-56.  
Google Scholar: [Author Only](#) [Title Only](#) [Author and Title](#)
- Zhang, Y., Vuković, L., Rudack, T., Han, W., and Schulten, K. (2016). Recognition of poly-ubiquitins by the proteasome through protein refolding guided by electrostatic and hydrophobic interactions. *J. Phys. Chem. B.* 120, 8137-8146.  
Google Scholar: [Author Only](#) [Title Only](#) [Author and Title](#)
- Zhang, Y., Zhao, Z., and Xue, Y. (2009). Roles of proteolysis in plant self-incompatibility. *Annu. Rev. Plant Biol.* 60, 21-42.  
Google Scholar: [Author Only](#) [Title Only](#) [Author and Title](#)
- Zhao, L., Huang, J., Zhao, Z., Li, Q., Sims, T.L., and Xue, Y. (2010). The Skp1-like protein SSK1 is required for cross-pollen compatibility in S-RNase-based self-incompatibility. *Plant J.* 62, 52-63.  
Google Scholar: [Author Only](#) [Title Only](#) [Author and Title](#)
